# Supplementary material for: Controlling the Site Selectivity in Acylations of Amphiphilic Diols: Directing the Reaction toward the Apolar Domain in a Model Diol and the Midecamycin A1 Macrolide Antibiotic
Source: PubMed Central journal article supplement (PMC9361358; doi:10.1021/acs.joc.2c00745), 2022-07-08

## Supporting Information

### **Controlling the Site Selectivity in Acylations of Amphiphilic Diols: Directing the Reaction Toward the Apolar Domain in a Model Diol and Midecamycin A<sub>1</sub> Macrolide Antibiotic**

Reut Fallek, Natali Ashush, Amit Fallek, Or Fleischer and Moshe Portnoy\*

*School of Chemistry, Raymond and Beverly Sackler Faculty of Exact Sciences, Tel Aviv  
University, Tel Aviv 699678, Israel*

[portnoy@tauex.tau.ac.il](mailto:portnoy@tauex.tau.ac.il)

## Table of Contents

|                                                       |     |
|-------------------------------------------------------|-----|
| $^1\text{H}$ and $^{13}\text{C}$ NMR and Mass Spectra | S3  |
| HPLC Traces                                           | S14 |

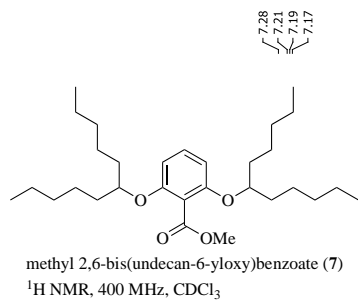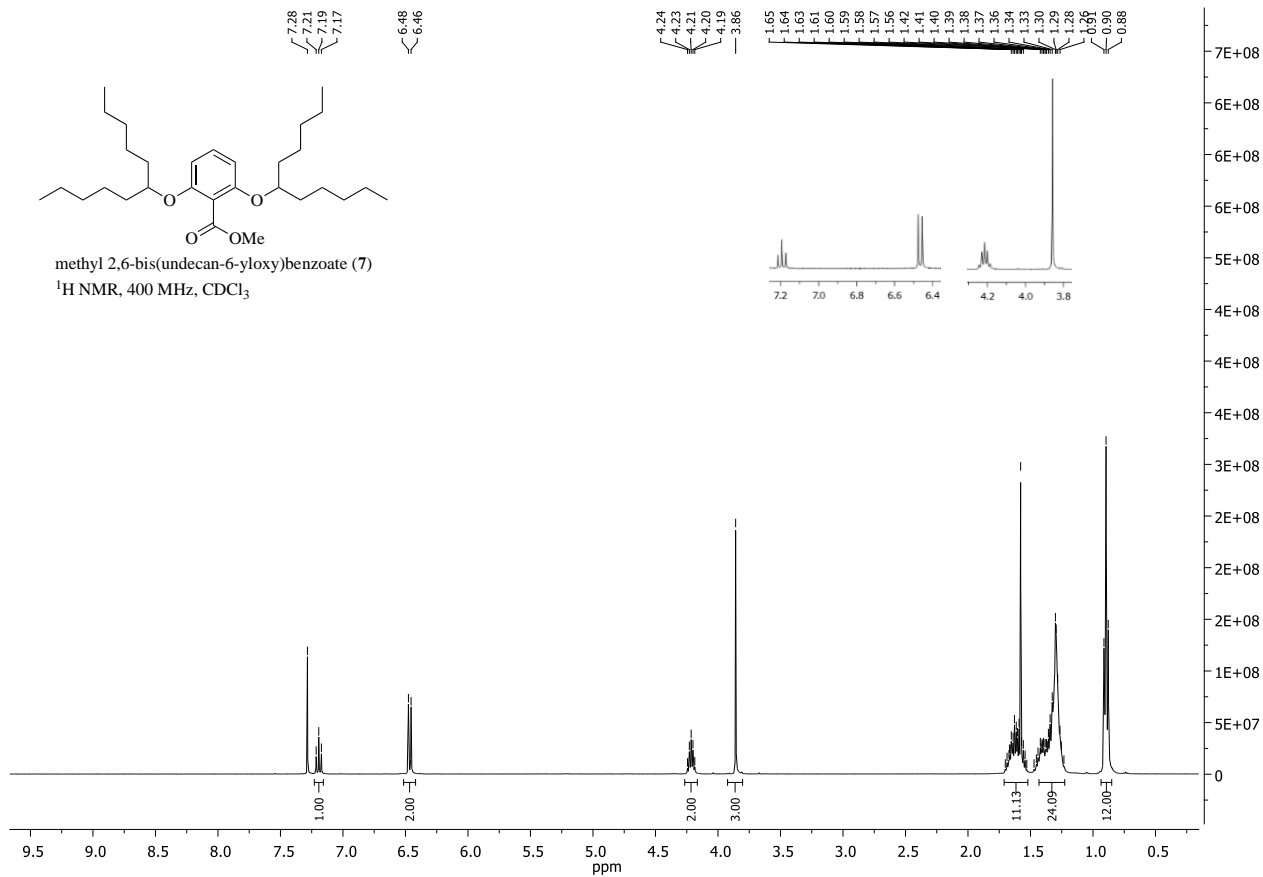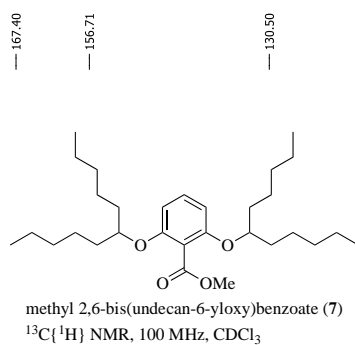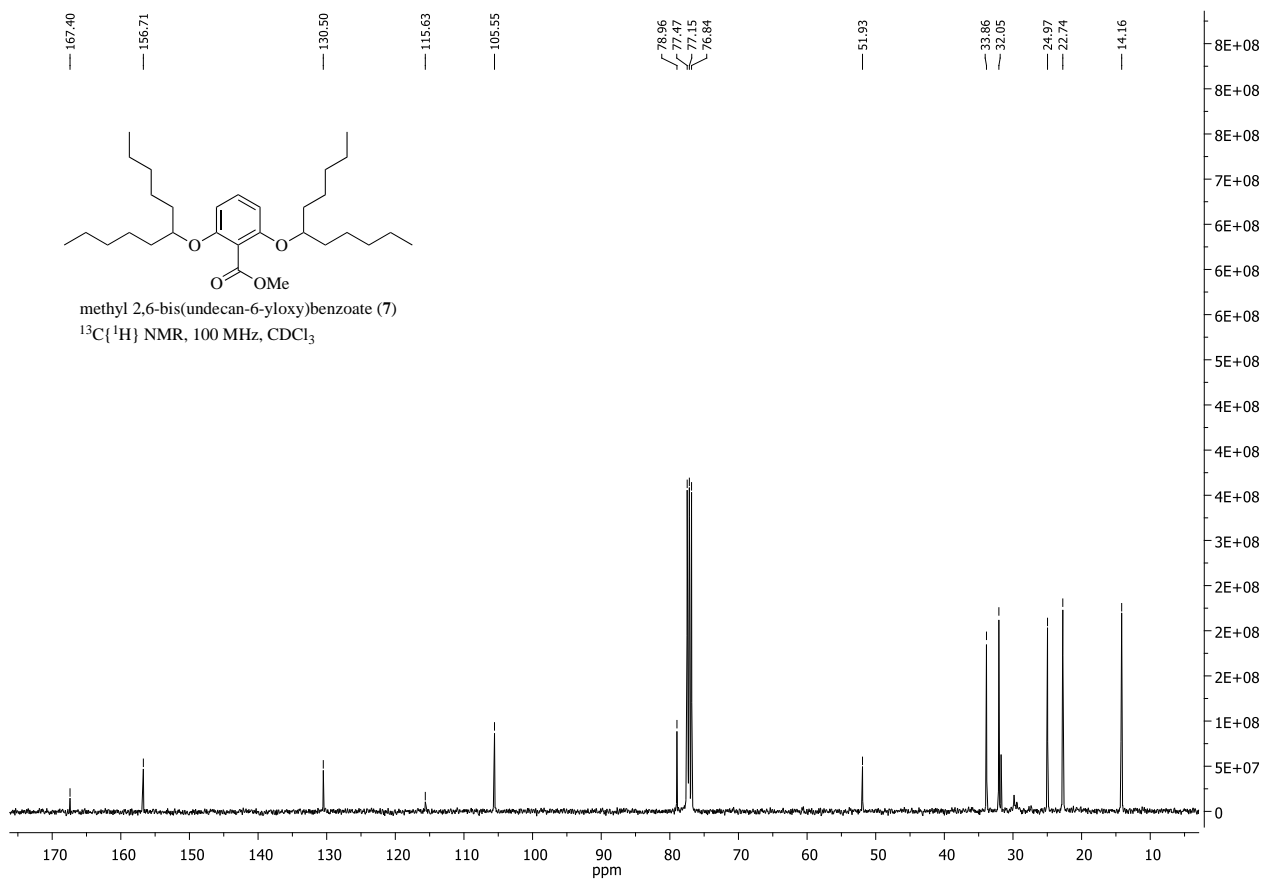

PORTNOY309 21 (1.074) Cm (19:23-110:147x5.000)

TOF MSAP+  
3.05e5

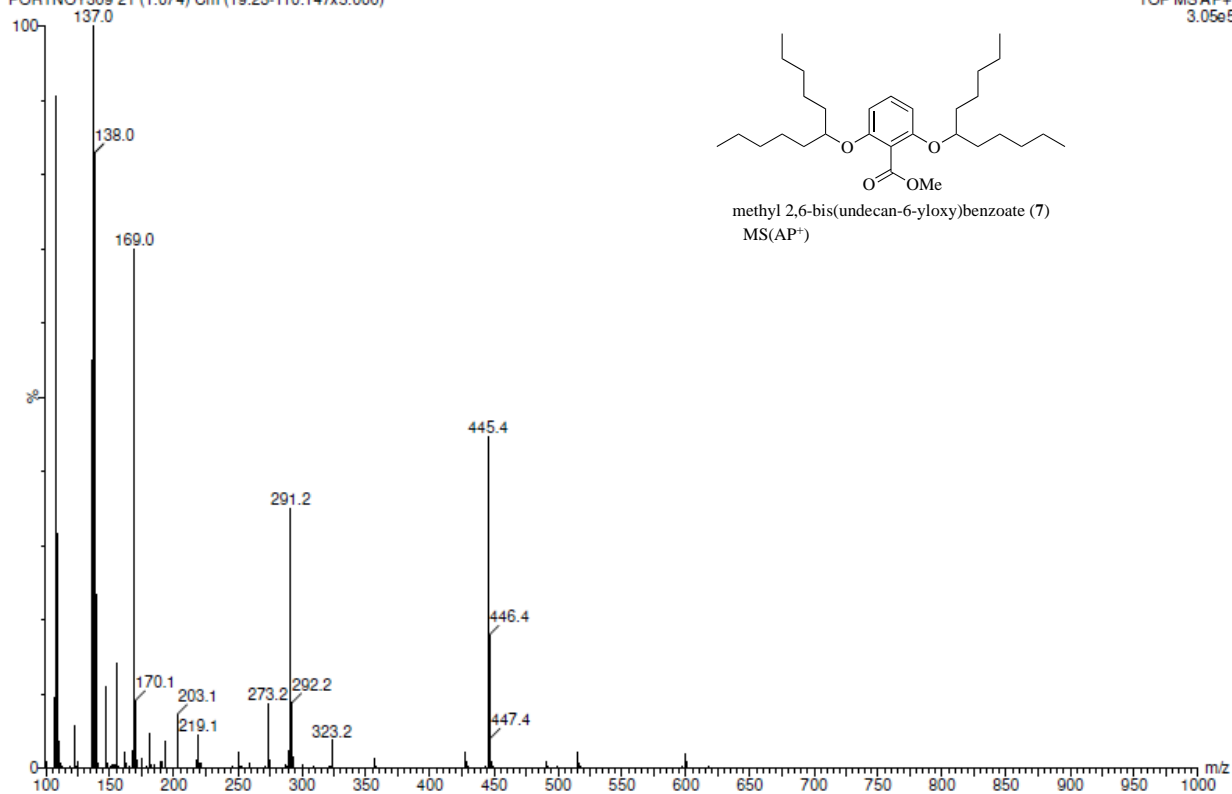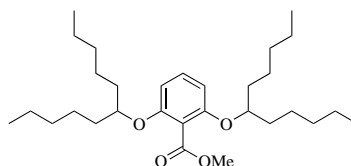

methyl 2,6-bis(undecan-6-yloxy)benzoate (7)  
MS(AP<sup>+</sup>)

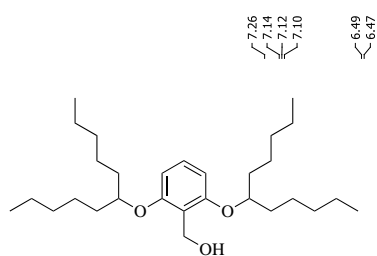

(2,6-bis(undecan-6-yloxy)phenyl)methanol (8)  
<sup>1</sup>H NMR, 400 MHz, CDCl<sub>3</sub>

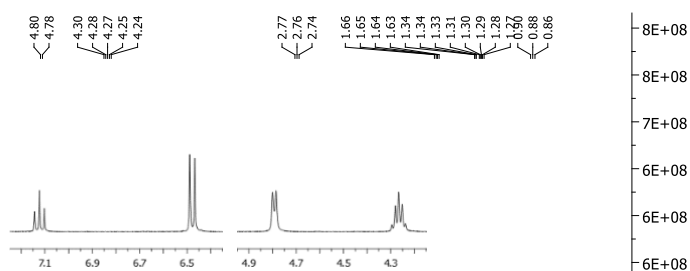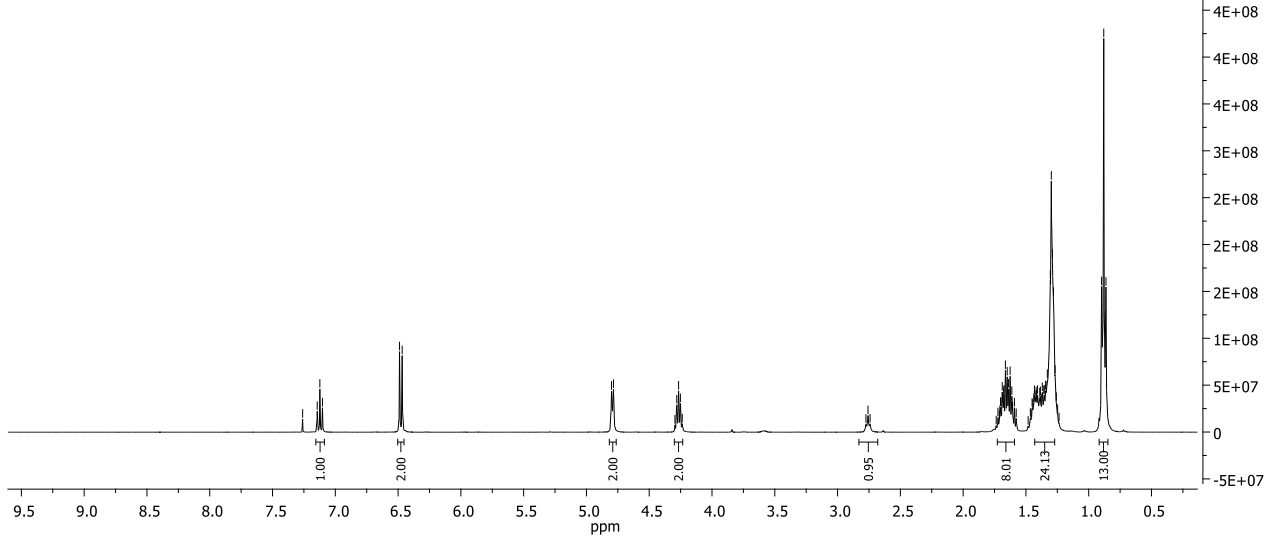

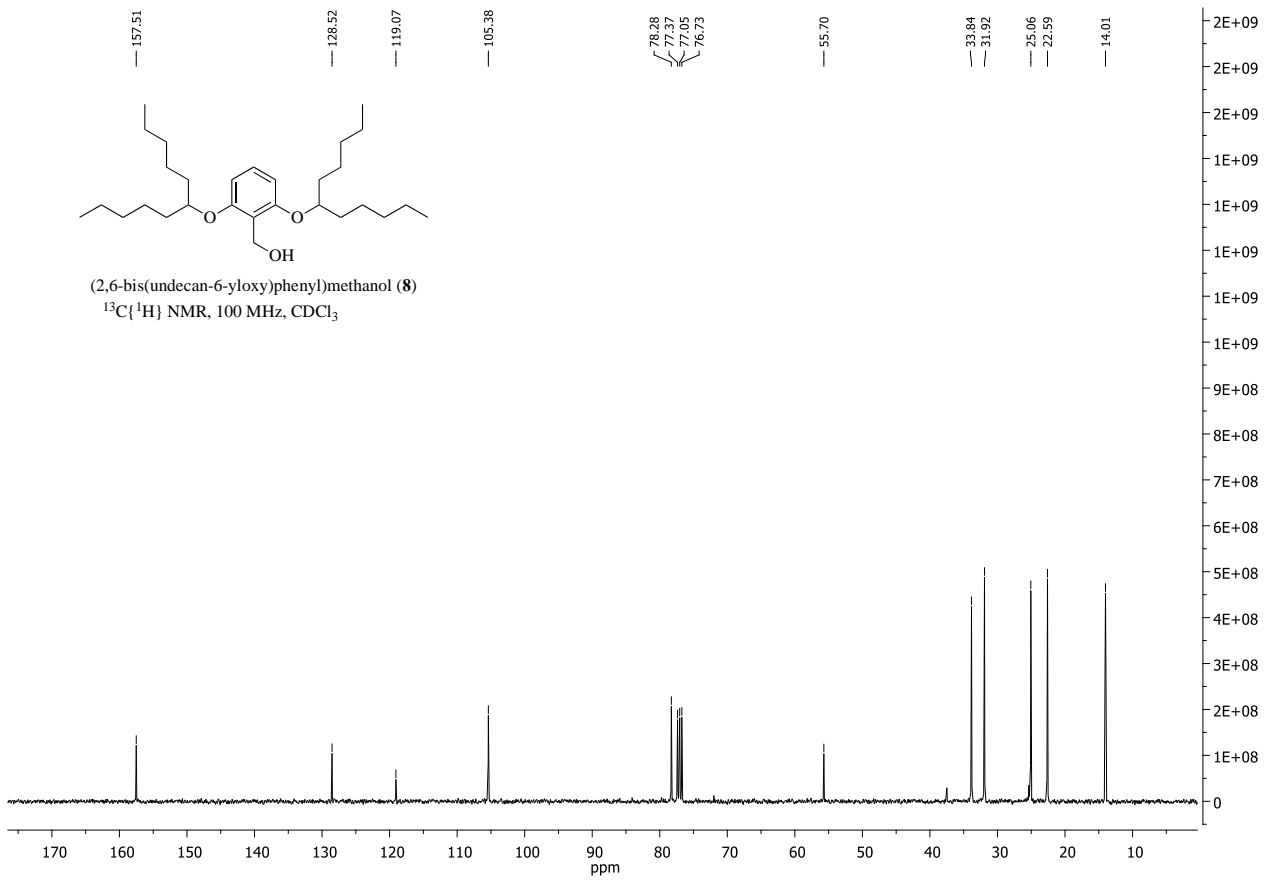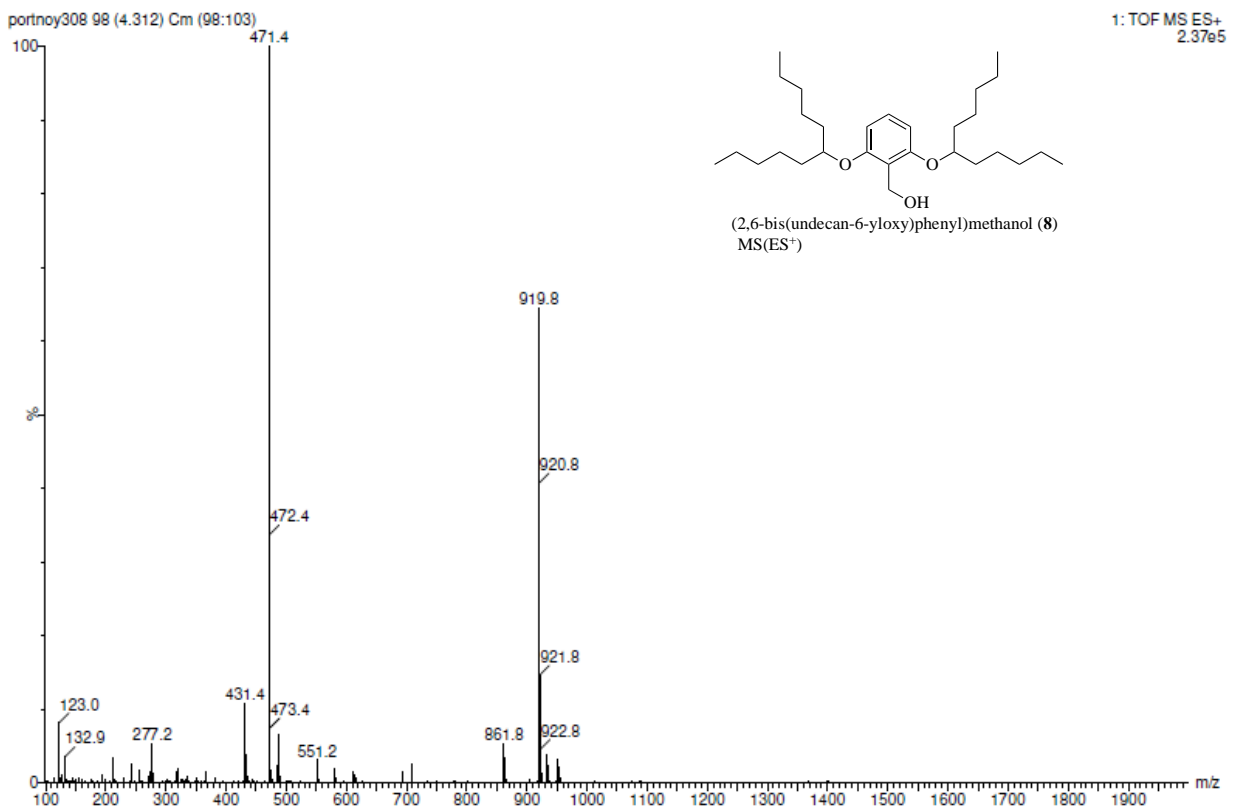

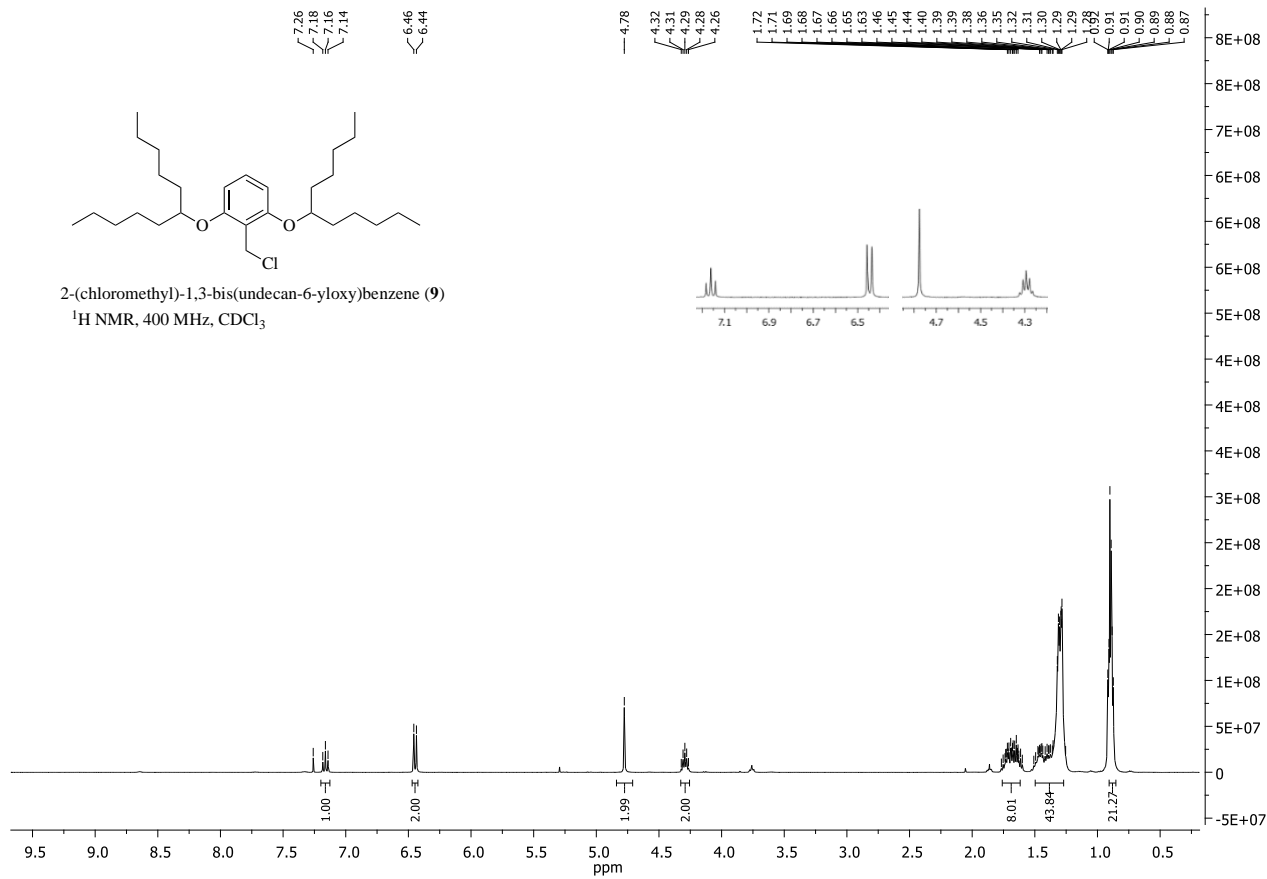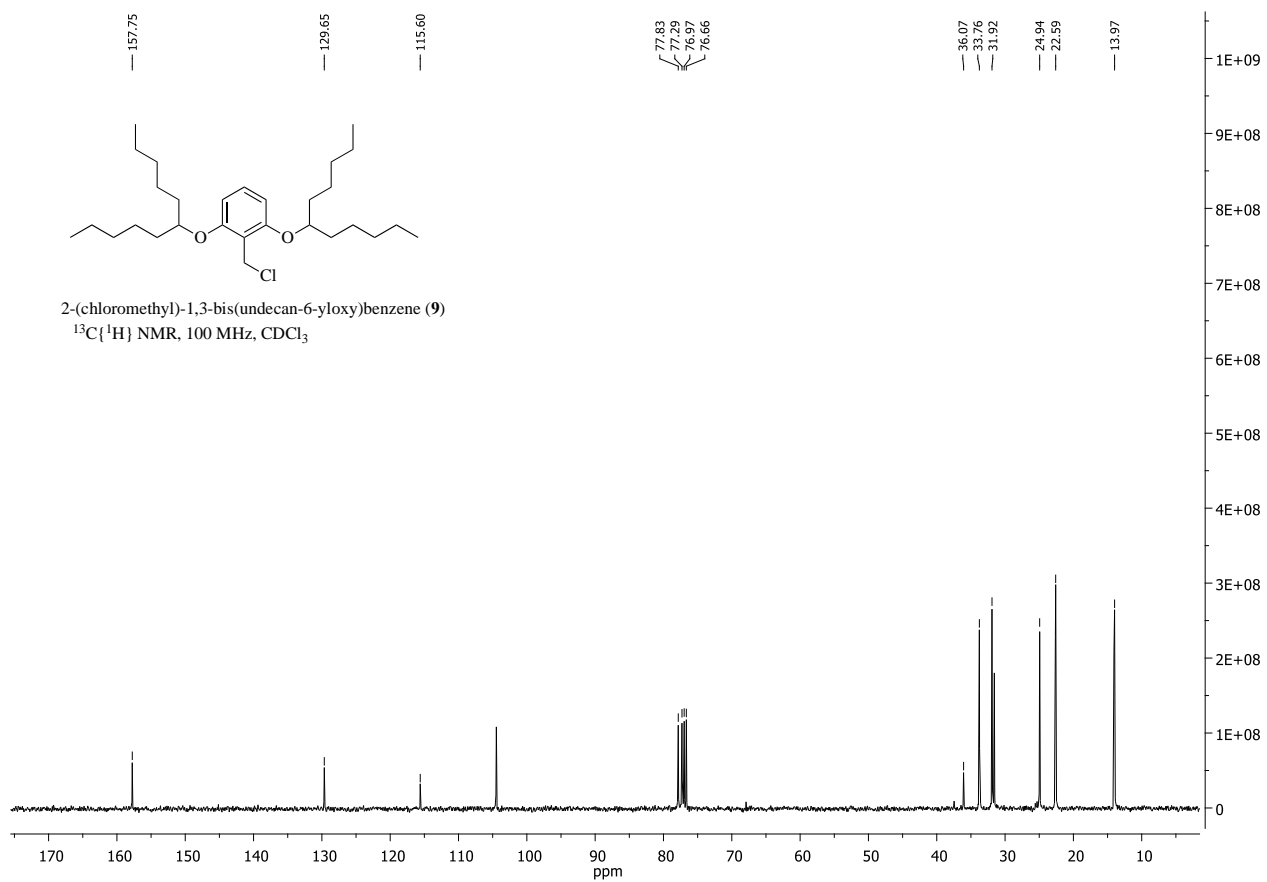

PORTNOY315 11 (0.570) Cm (11.34-276x5.000)

TOF MSAP+  
2.69e4

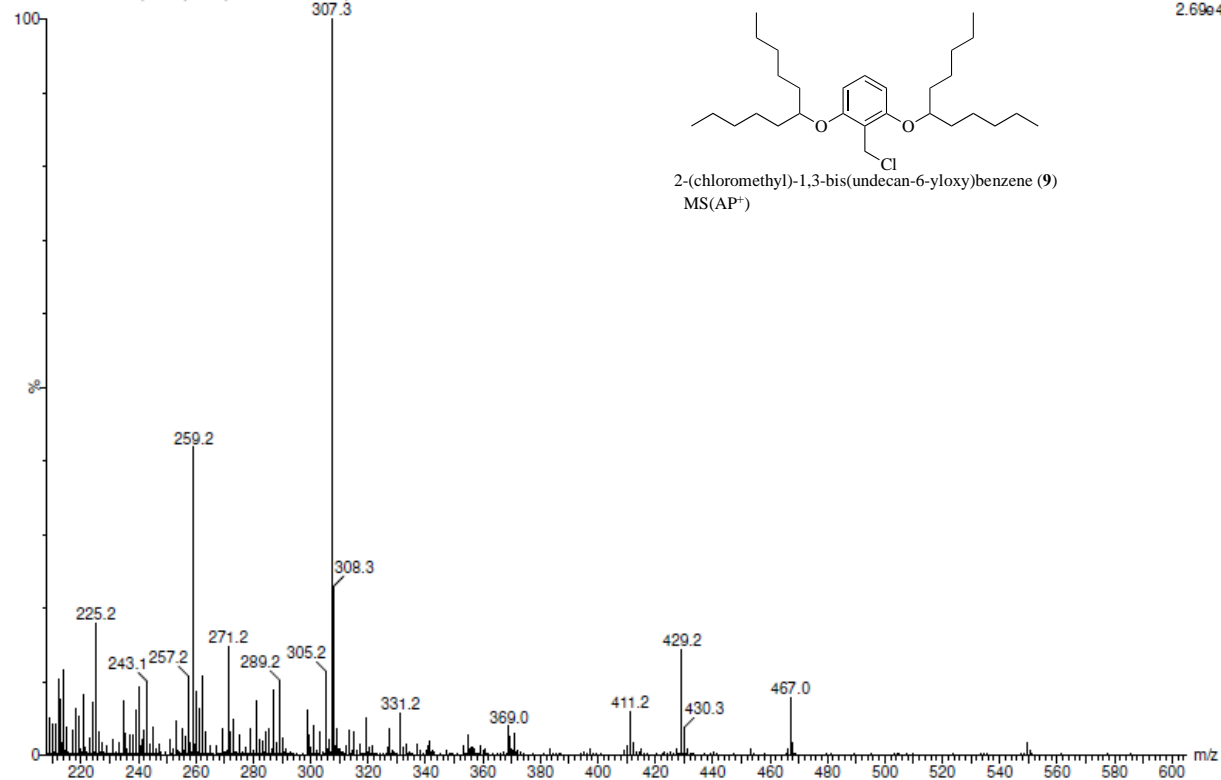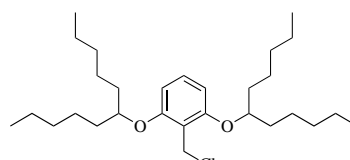

2-(chloromethyl)-1,3-bis(undecan-6-yloxy)benzene (**9**)  
MS(AP<sup>+</sup>)

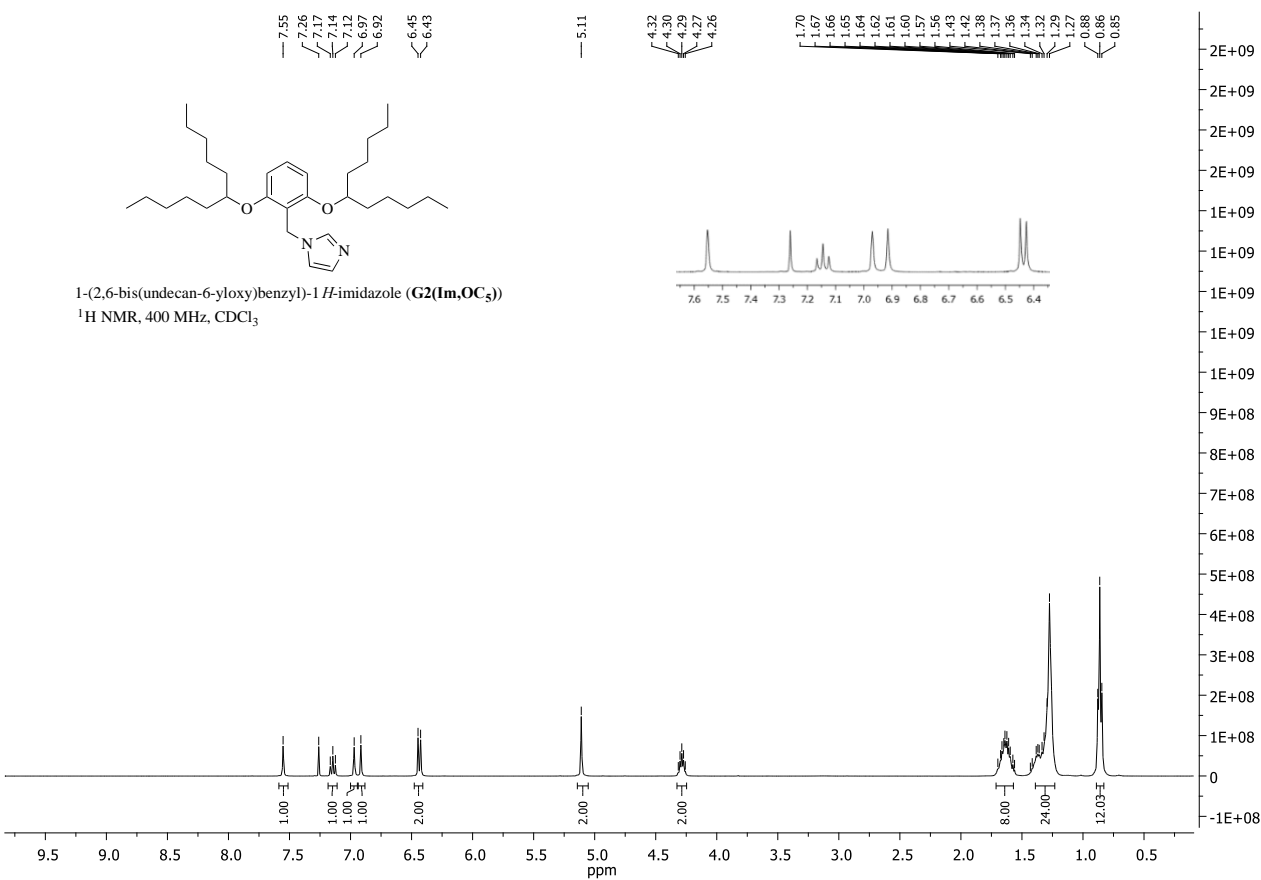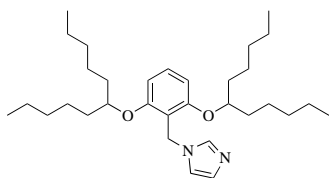

1-(2,6-bis(undecan-6-yloxy)benzyl)-1H-imidazole (**G2(Im,OC<sub>5</sub>)**)

<sup>1</sup>H NMR, 400 MHz, CDCl<sub>3</sub>

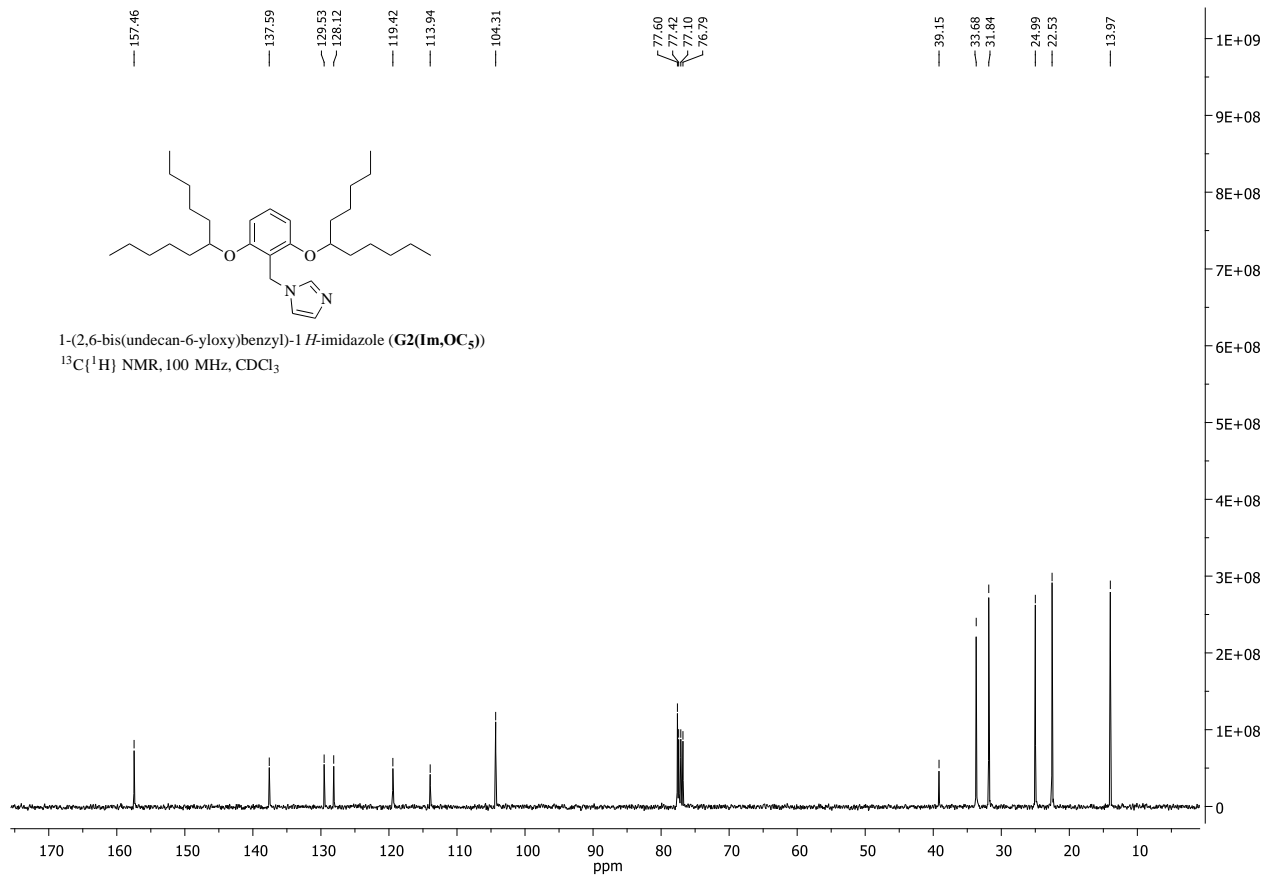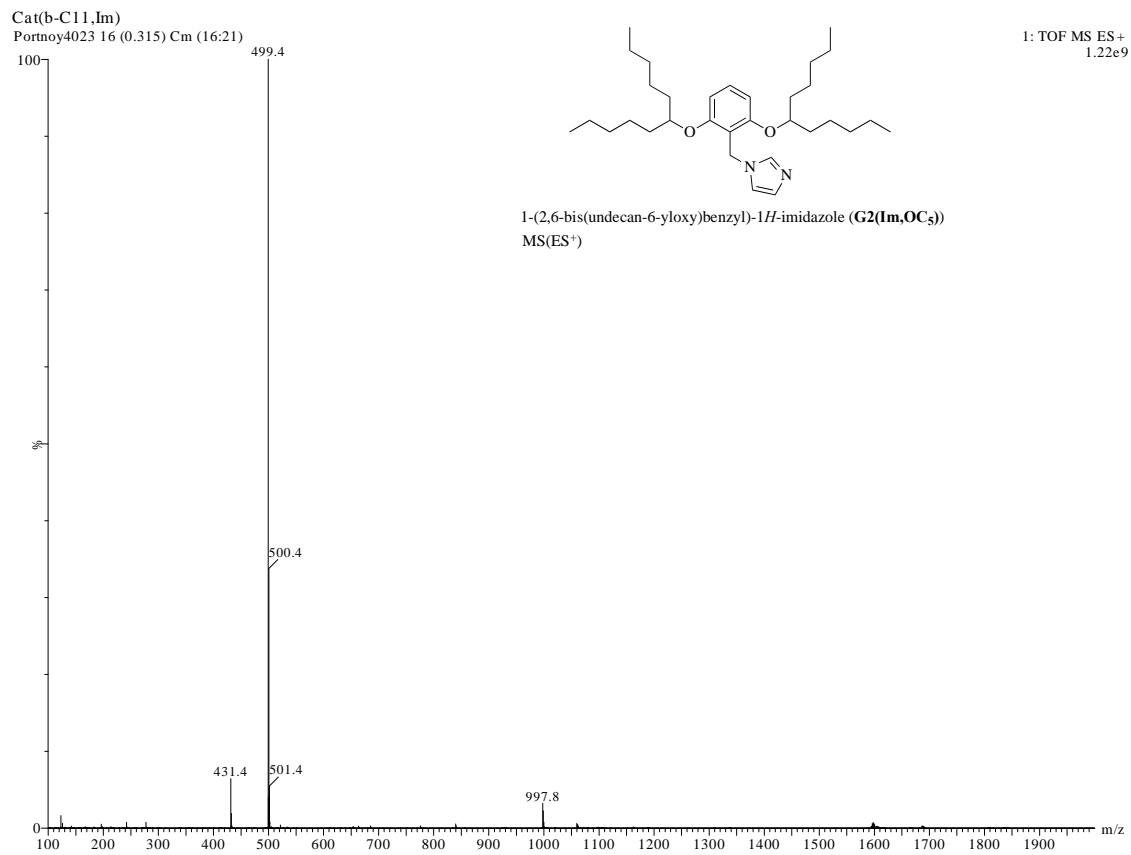



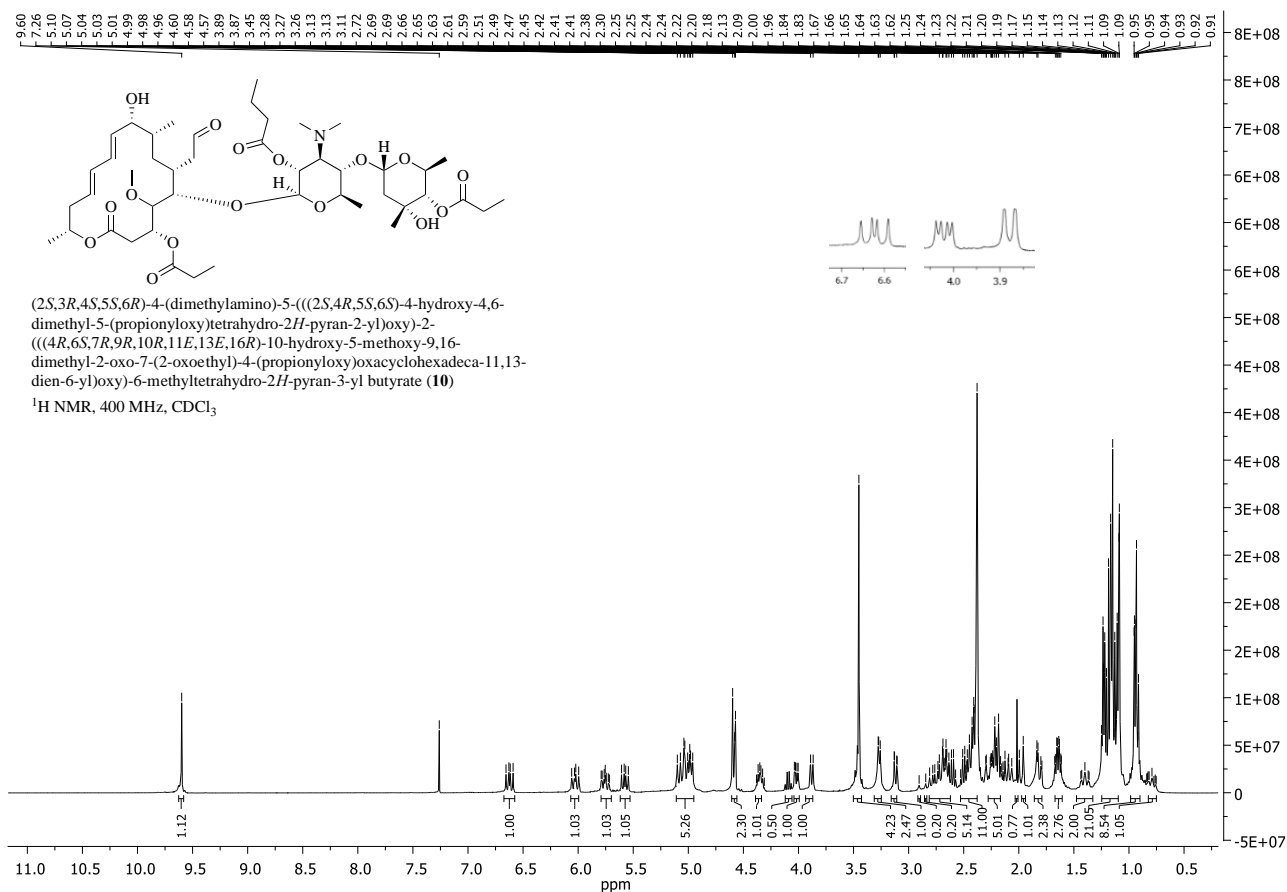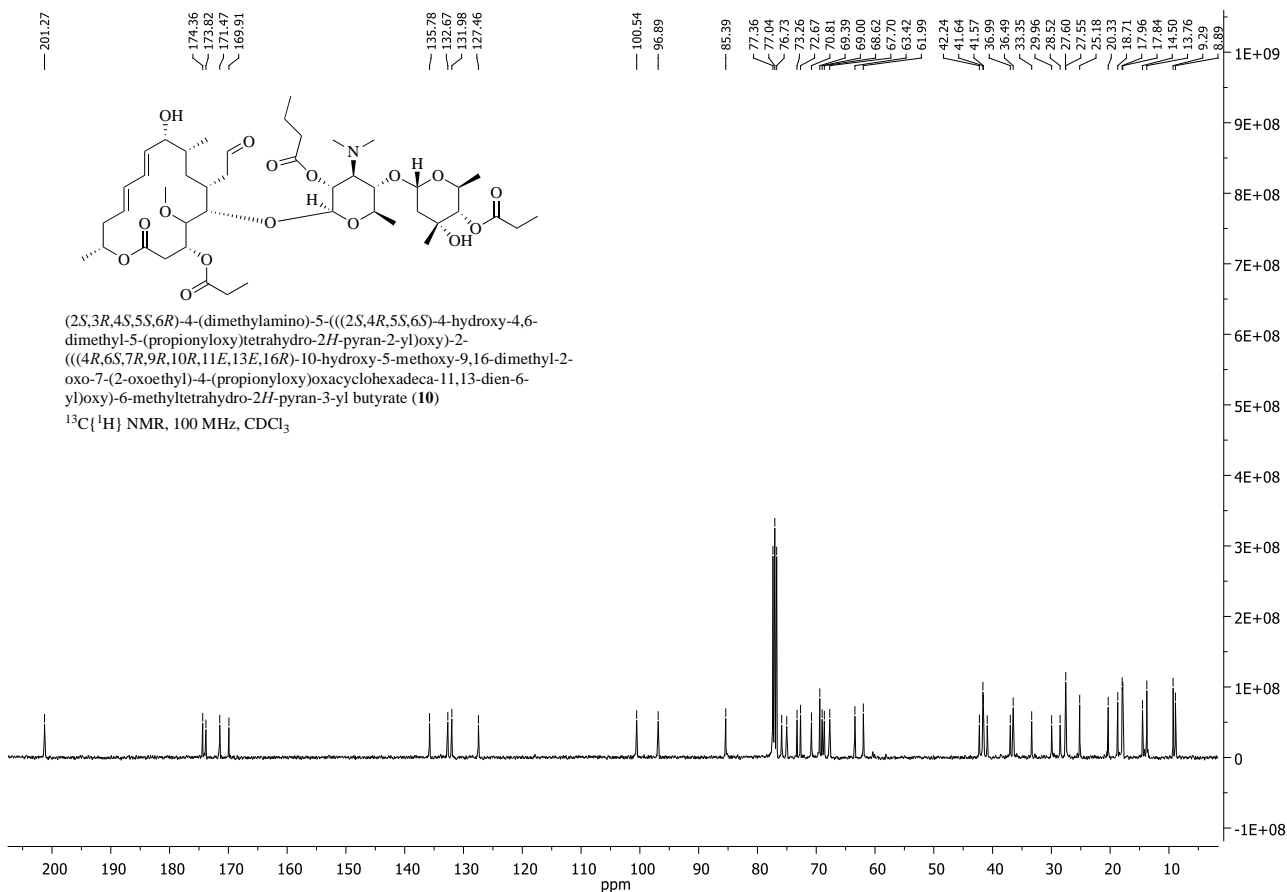

PORTNOY325e 62 (2.734) Cm (61:99-14:22x5.000)

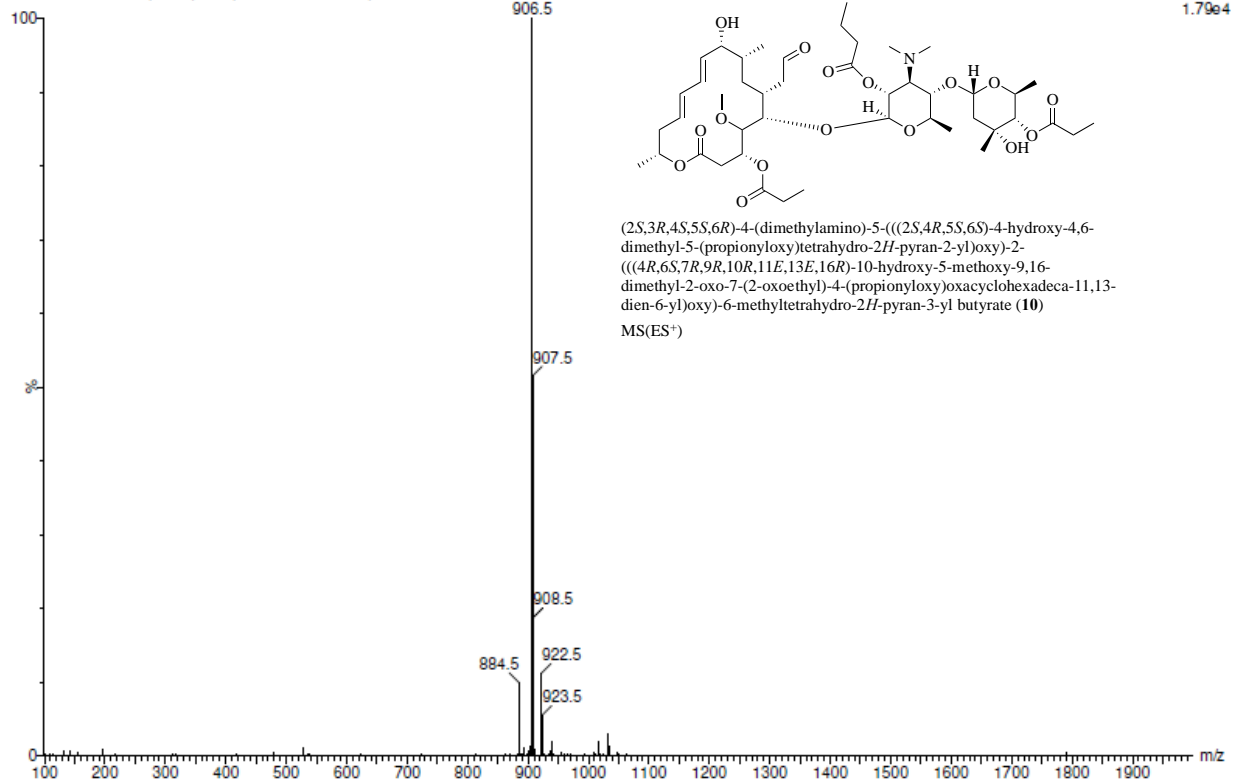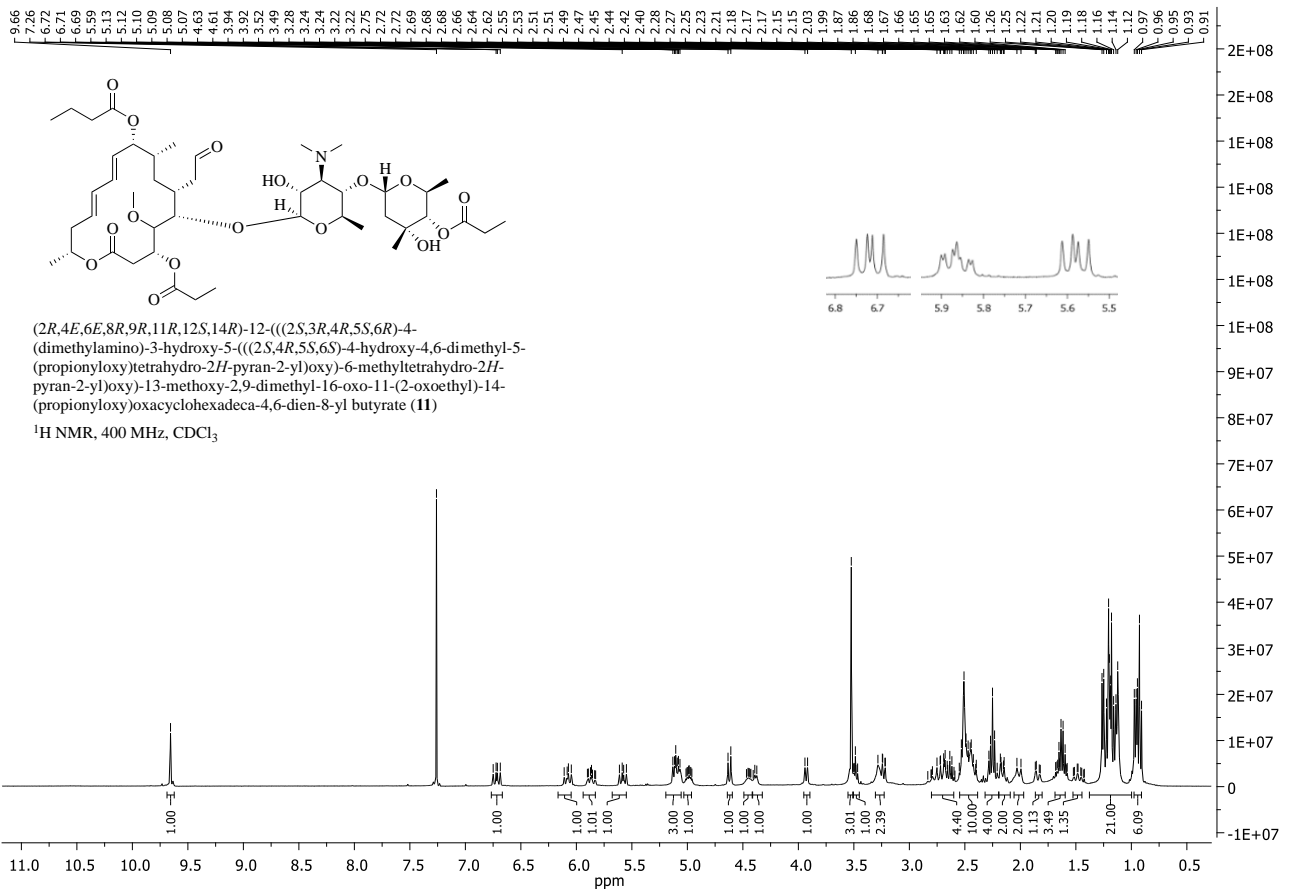

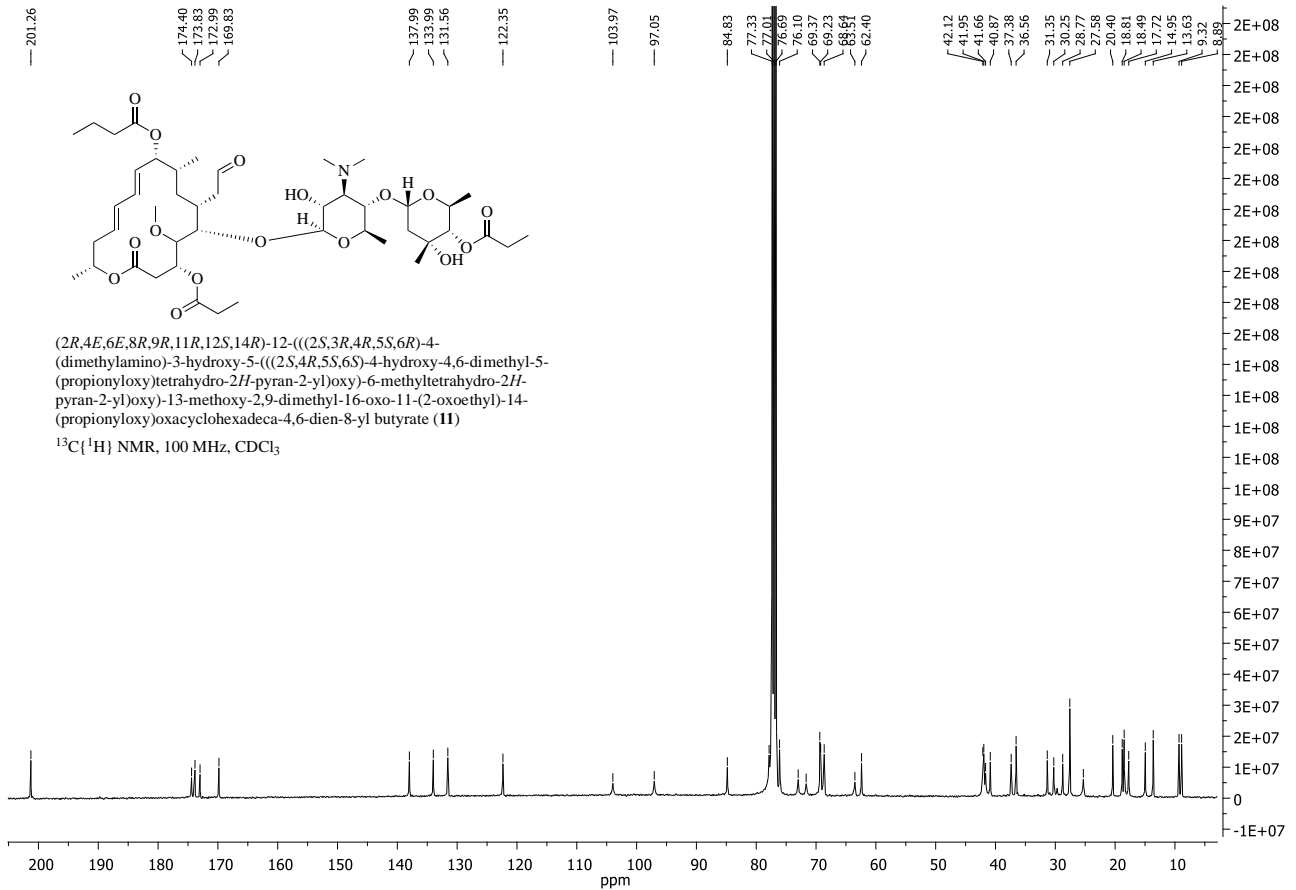

PORTNOY363 62 (2.734) Cm (52:64-1.5x5.000)

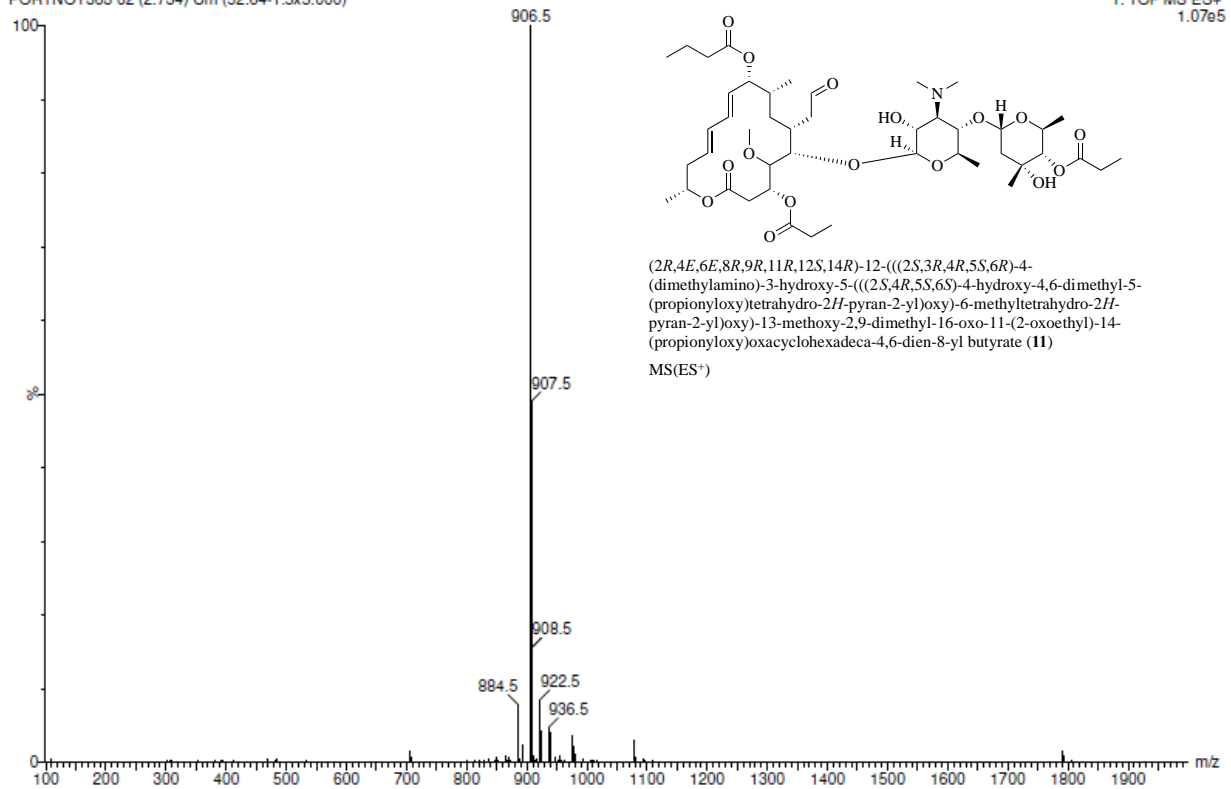

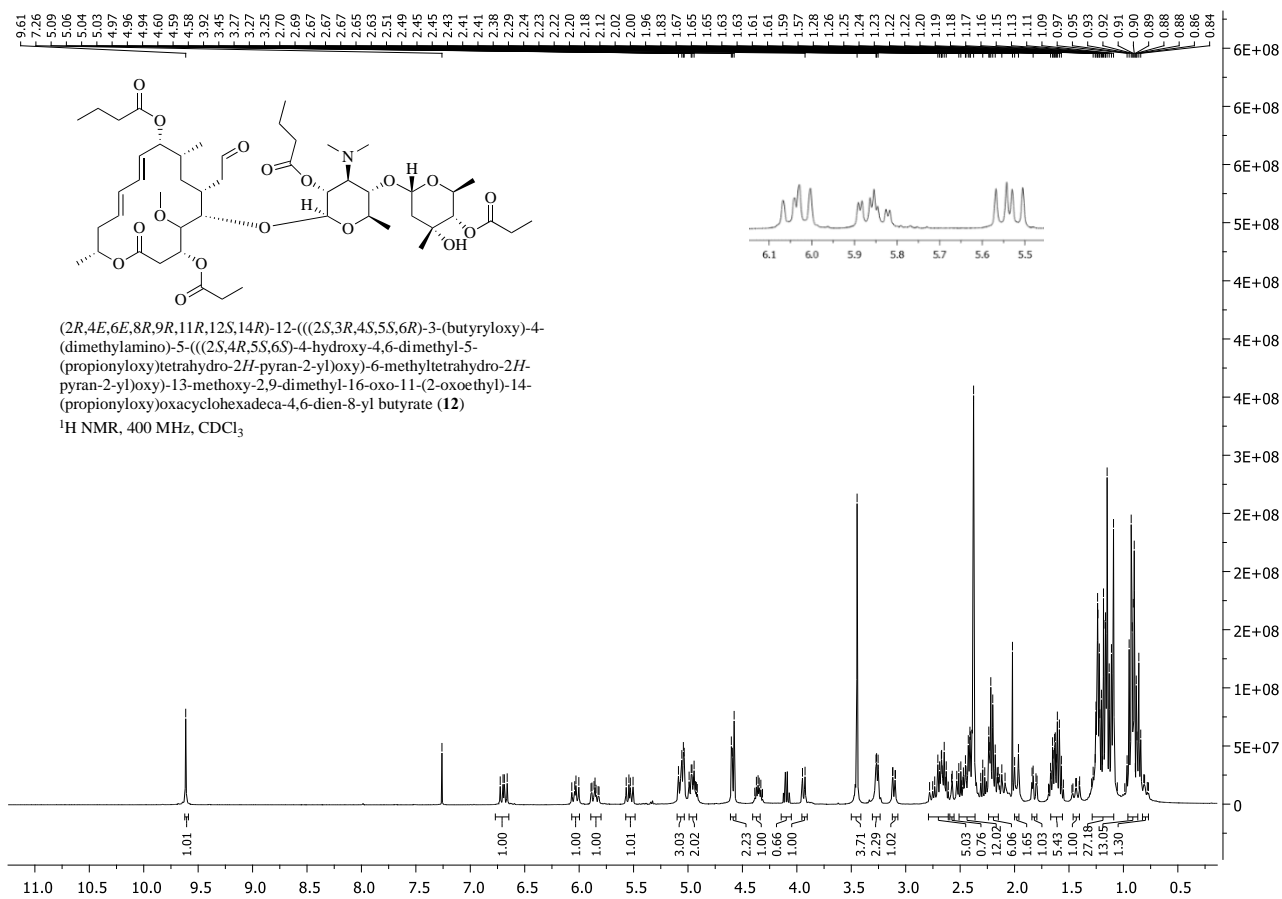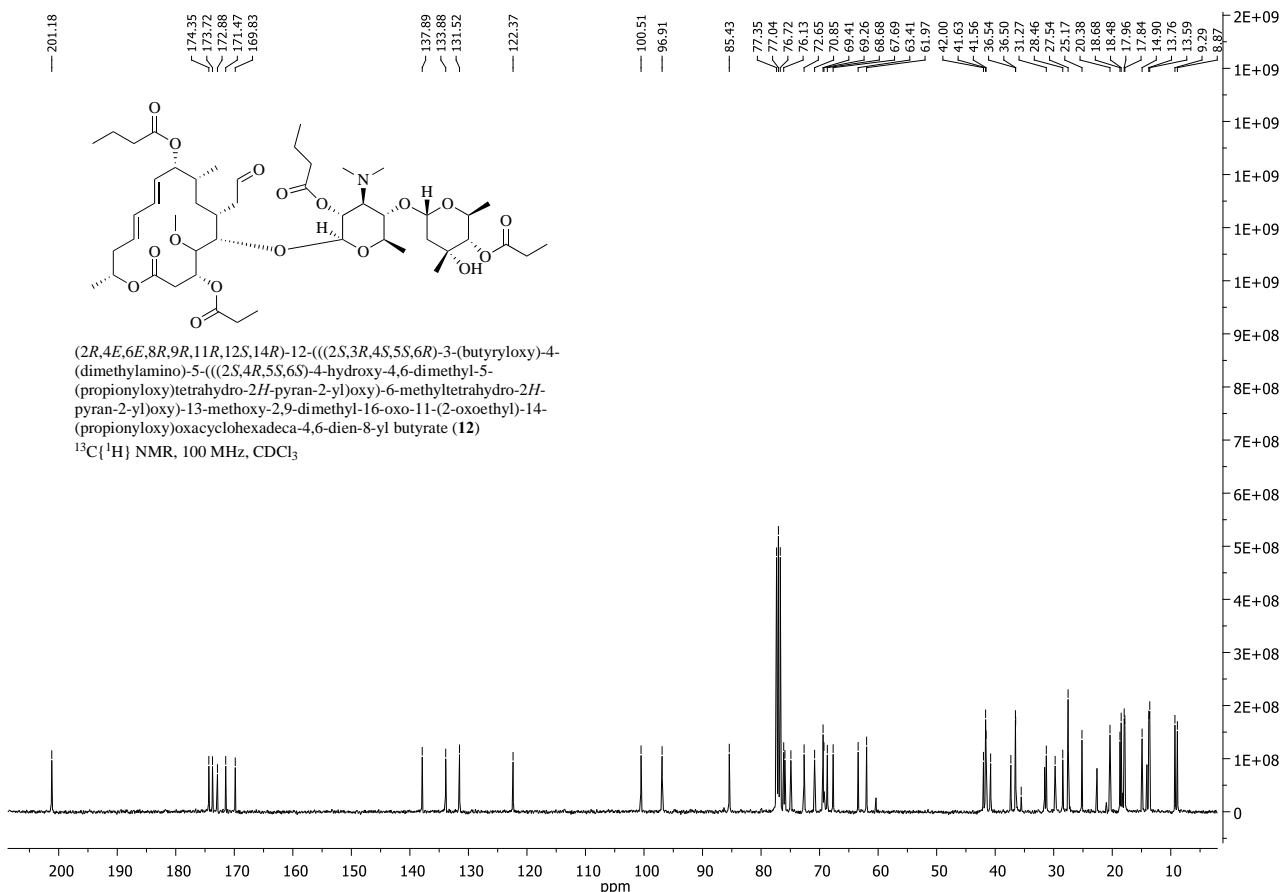

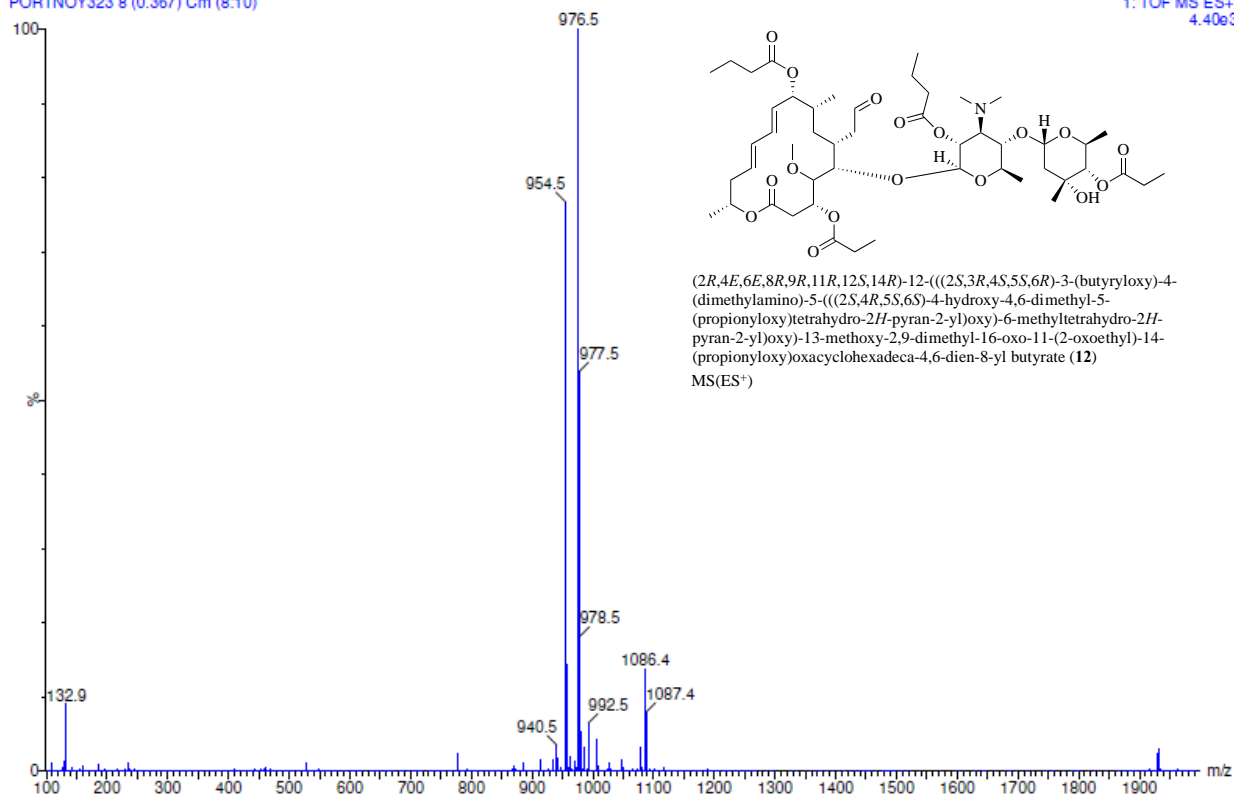

Time: 12.4386 Minutes - Amplitude: -0.12825 mAU

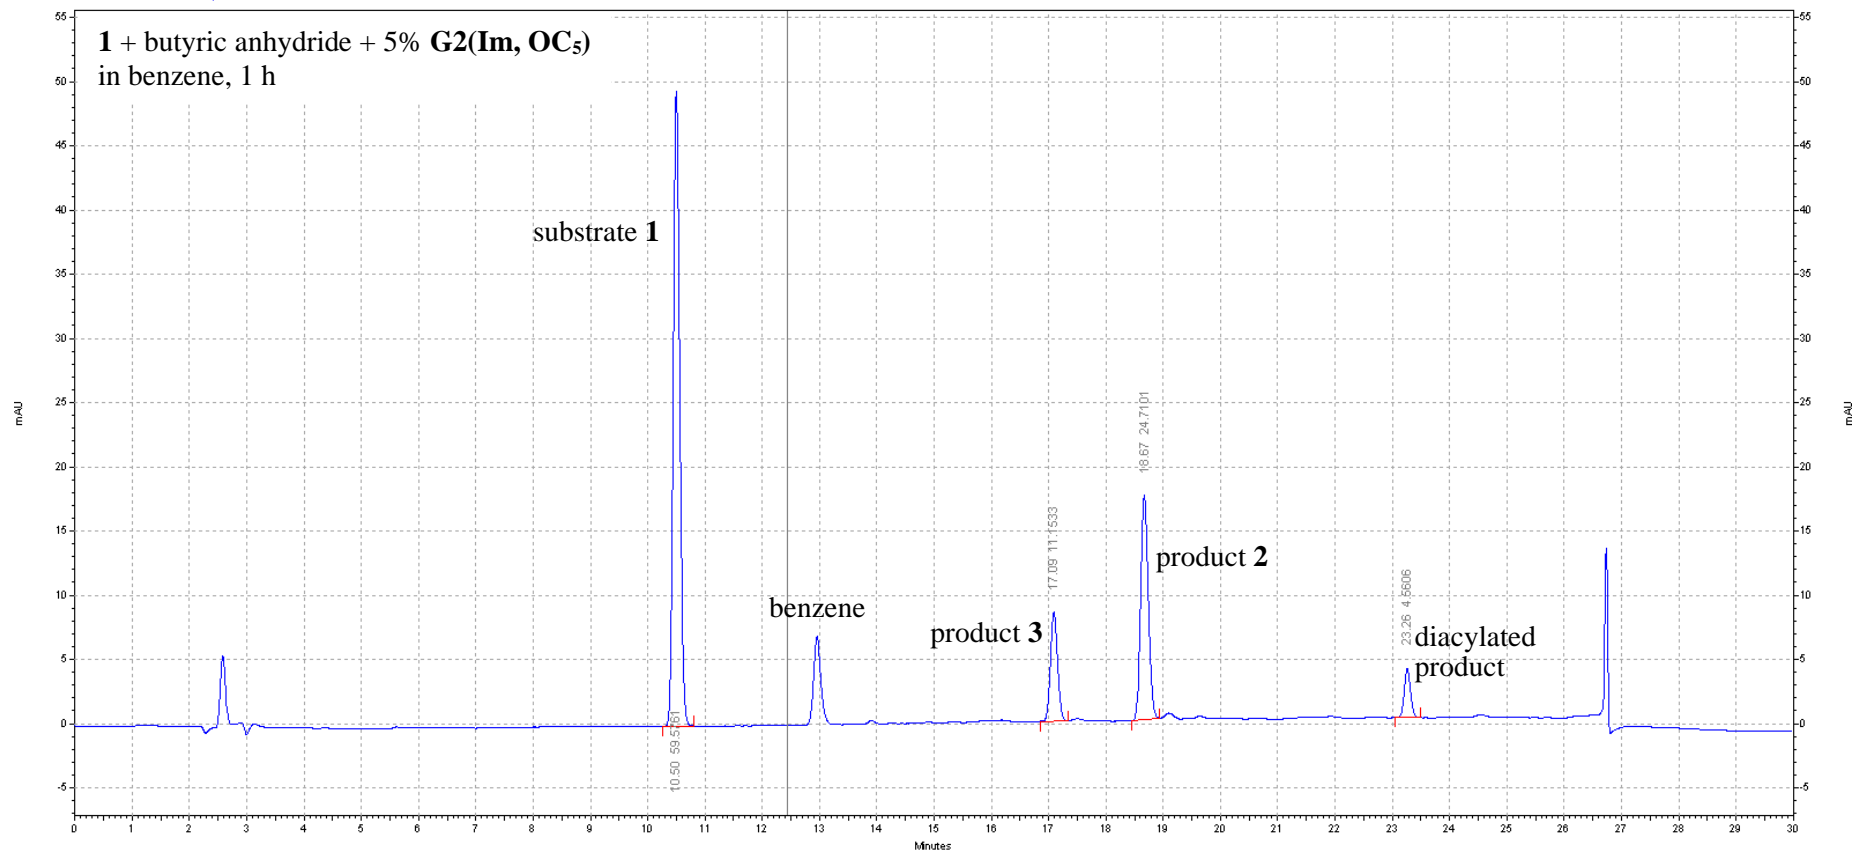

Time: 7.61778 Minutes - Amplitude: 0.03025 mAU

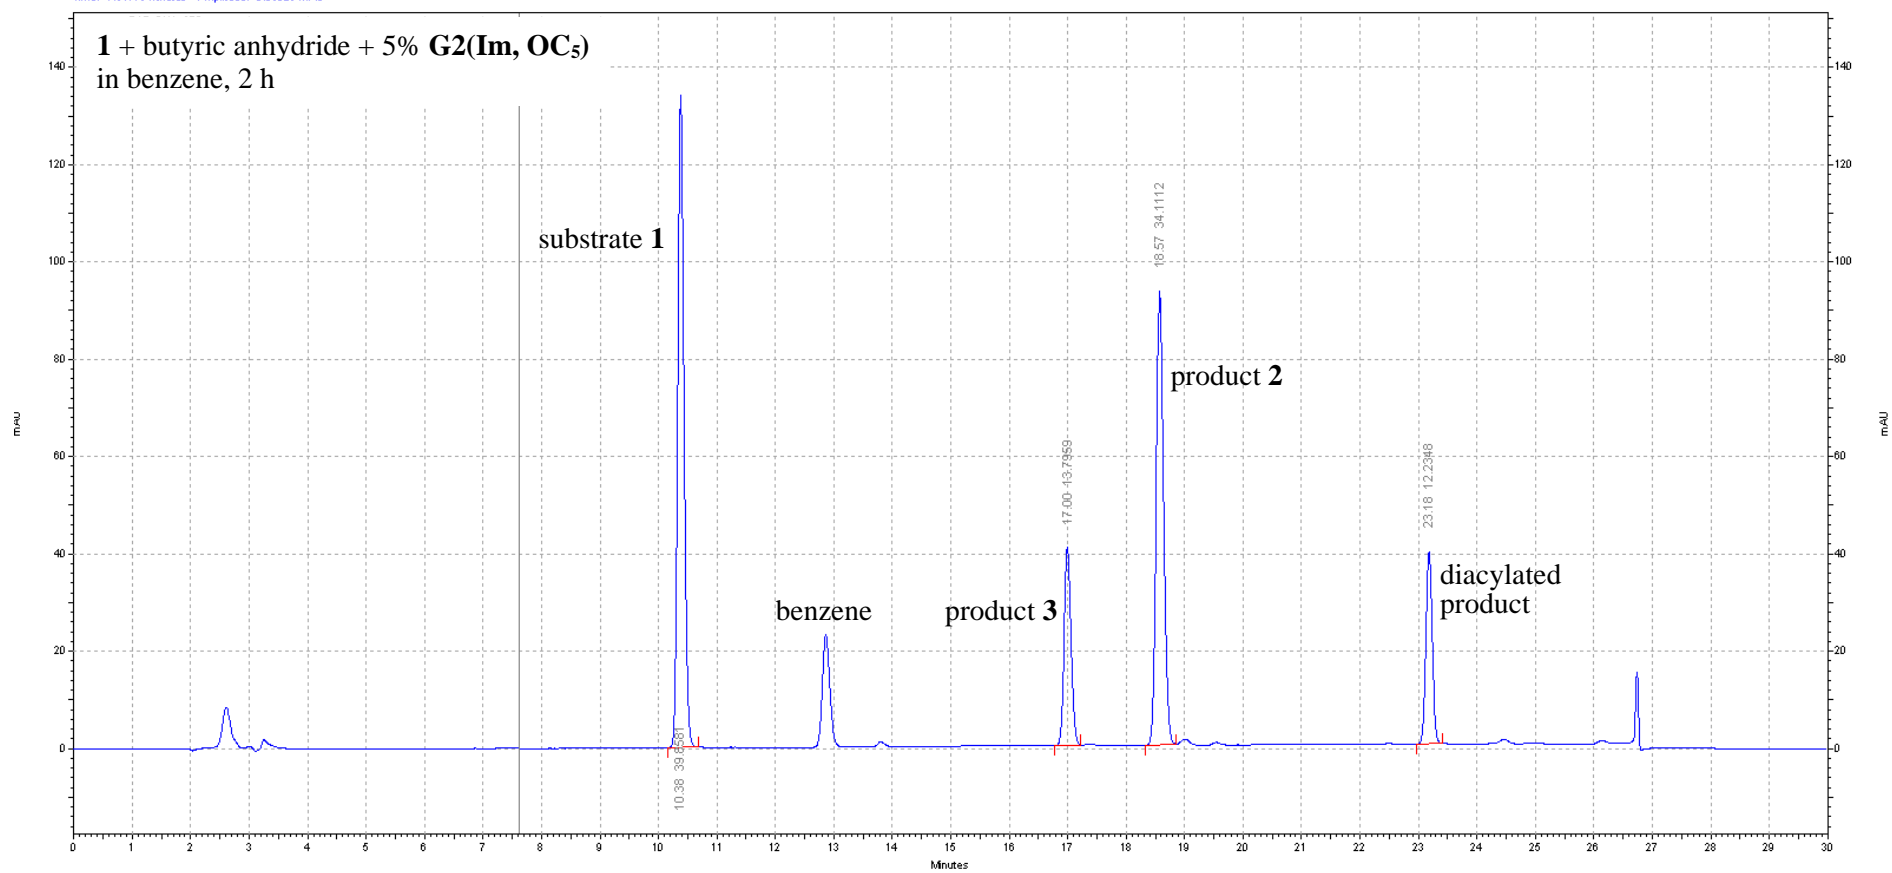





Time: 16.3304 Minutes - Amplitude: 0.6325 mAU

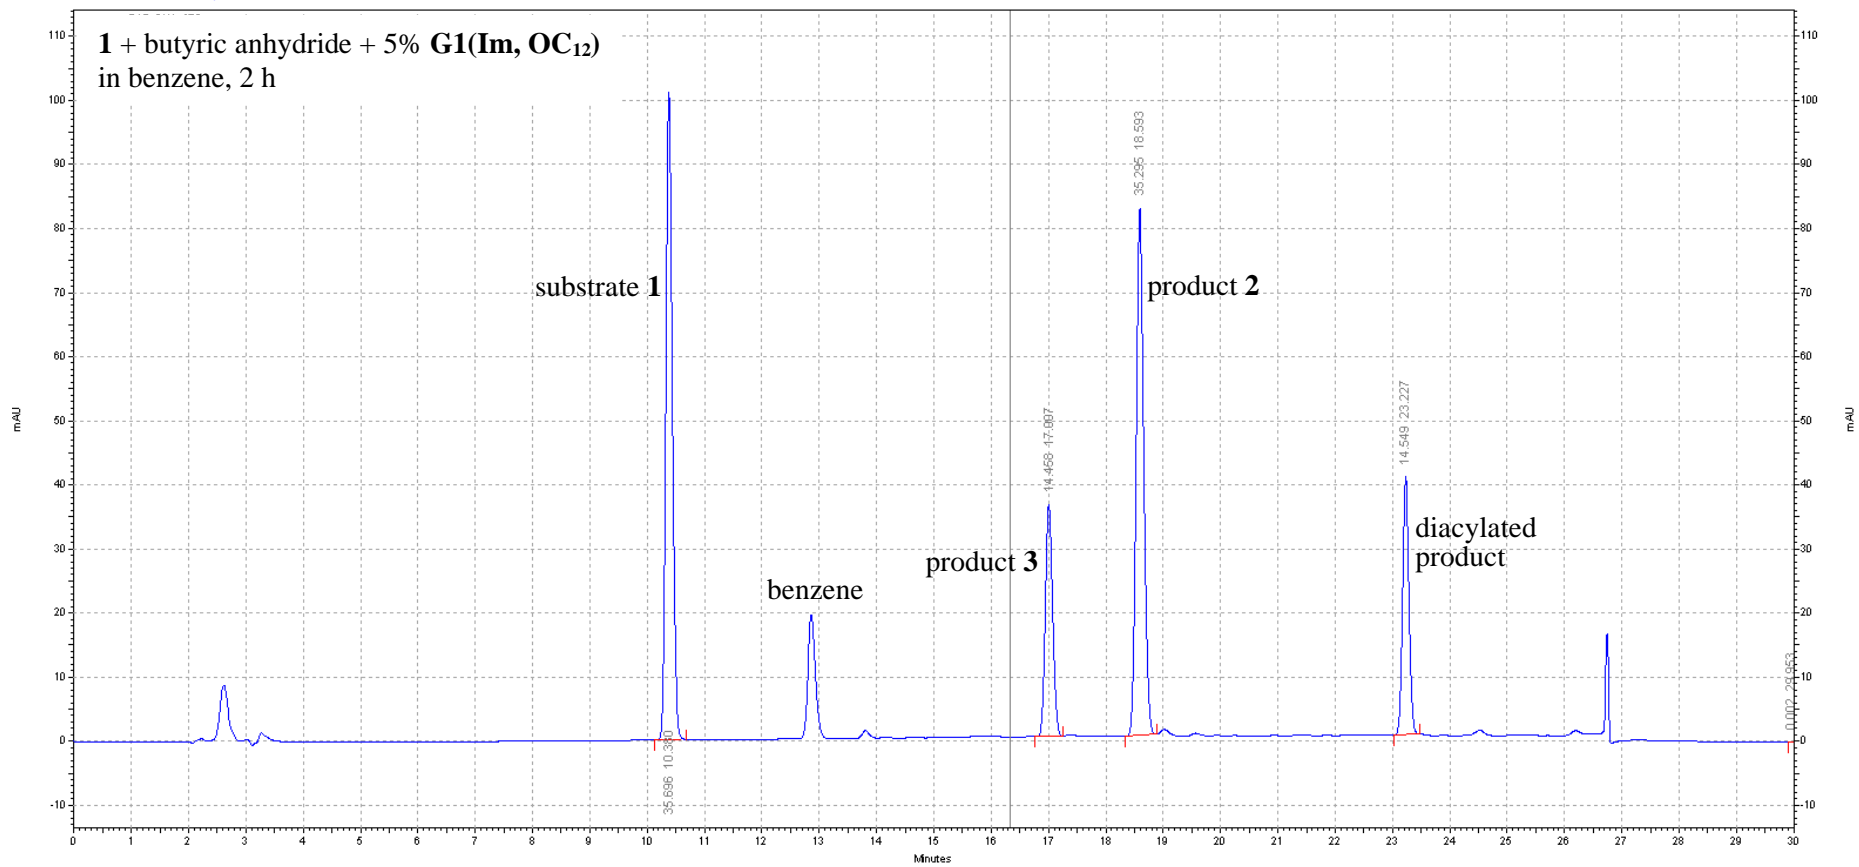

Time: 27.1223 Minutes - Amplitude: 0.728 mAU

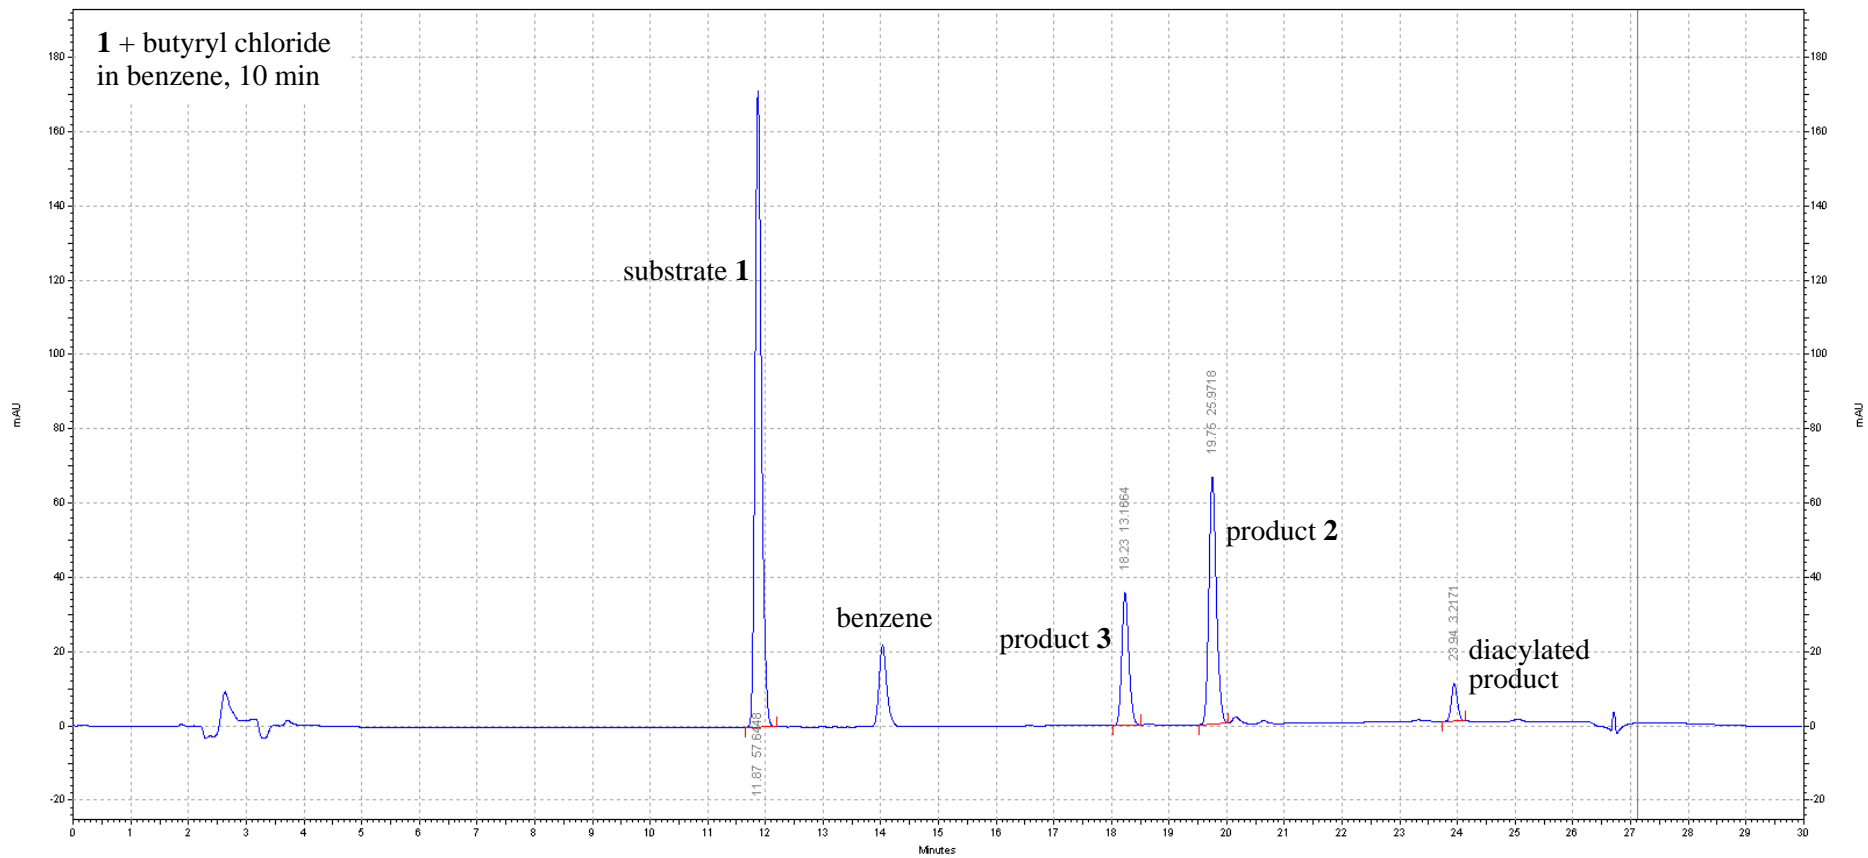

Time: 23.3298 Minutes - Amplitude: 1.12225 mAU

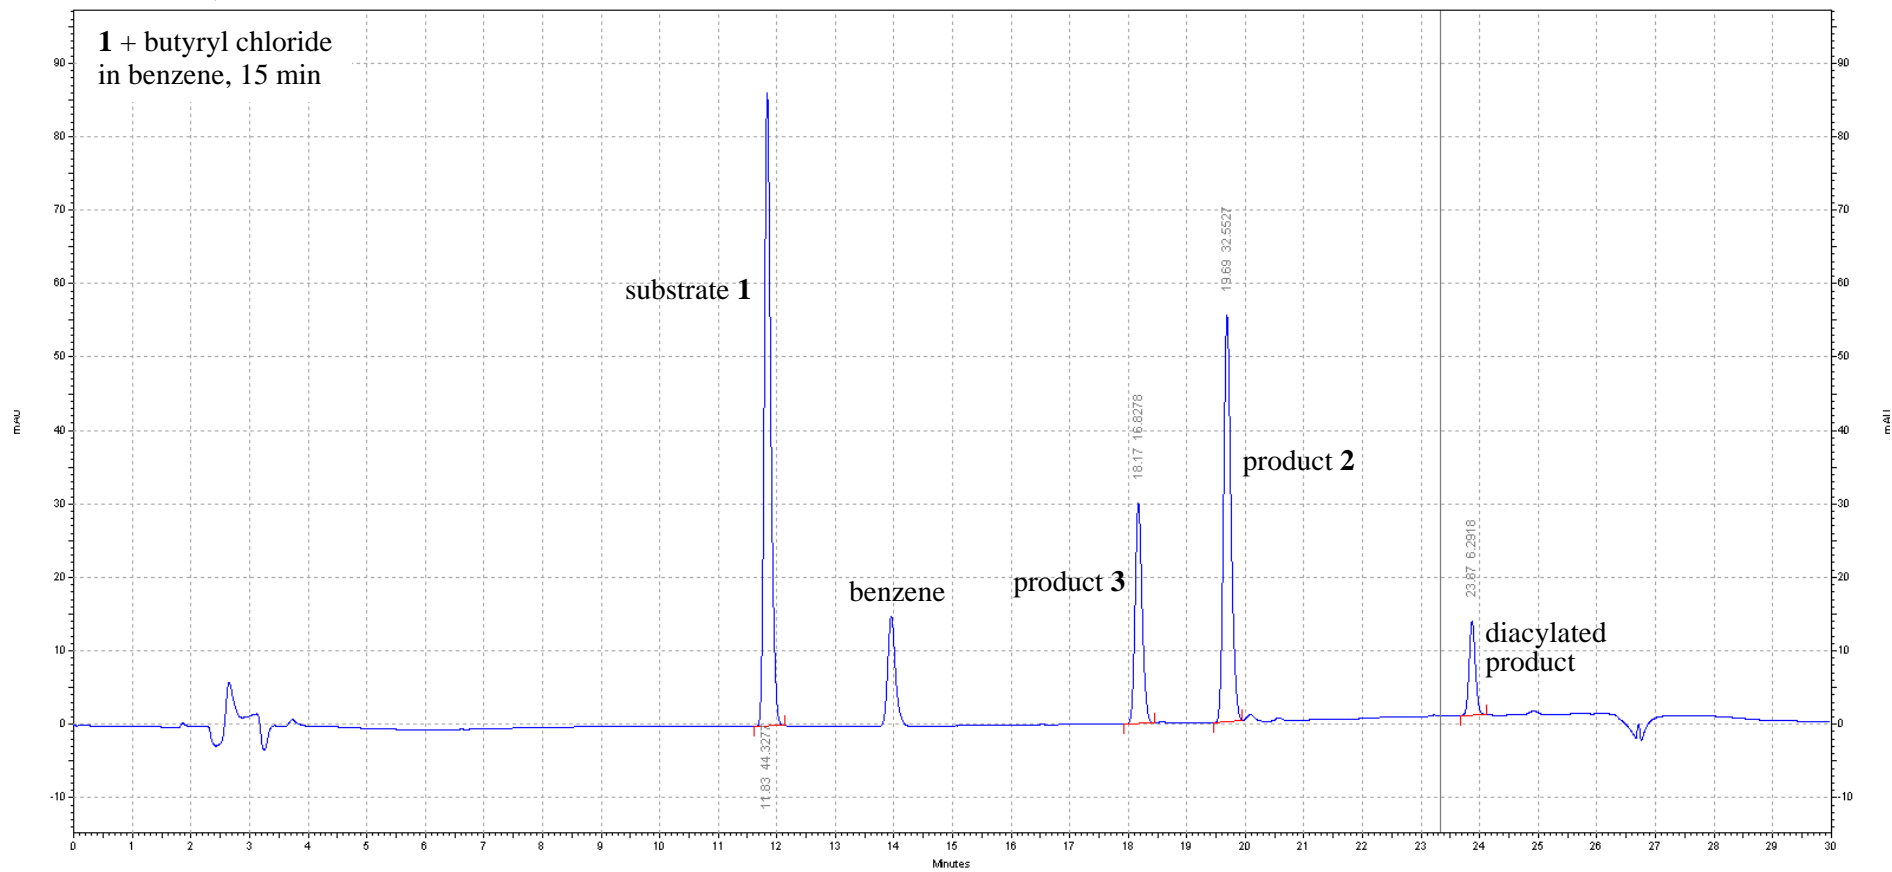

Time: 26.5772 Minutes - Amplitude: -0.6425 mAU

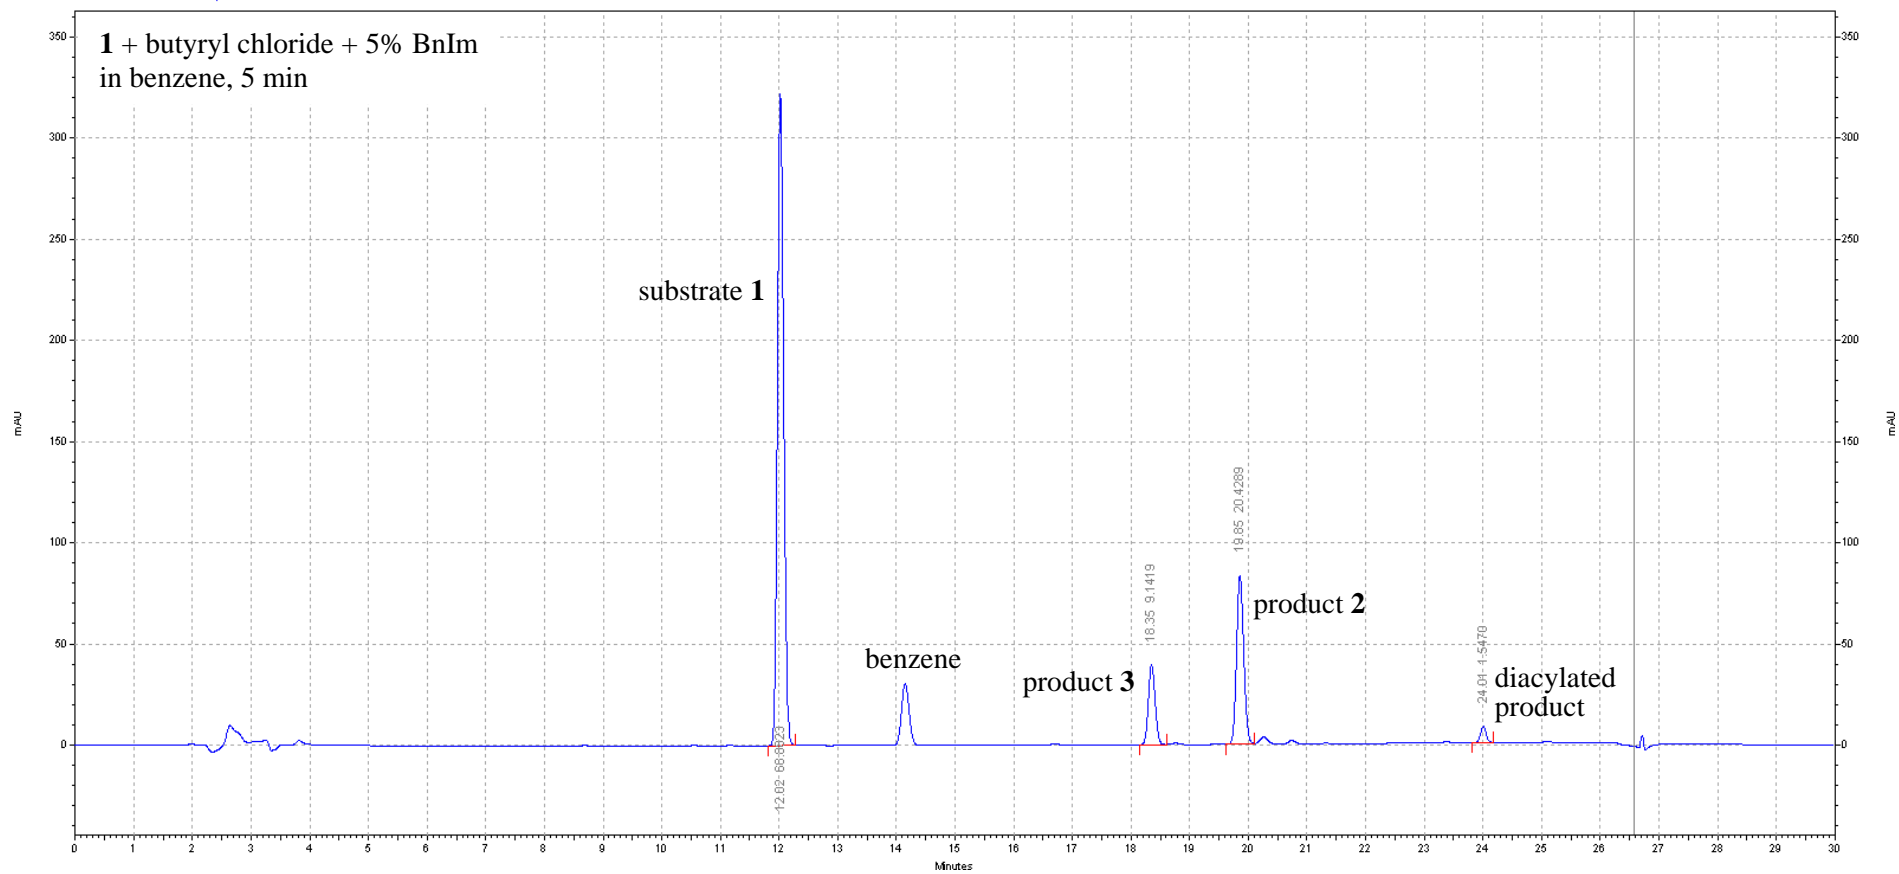

Time: 27.3441 Minutes - Amplitude: 0.791 mAU

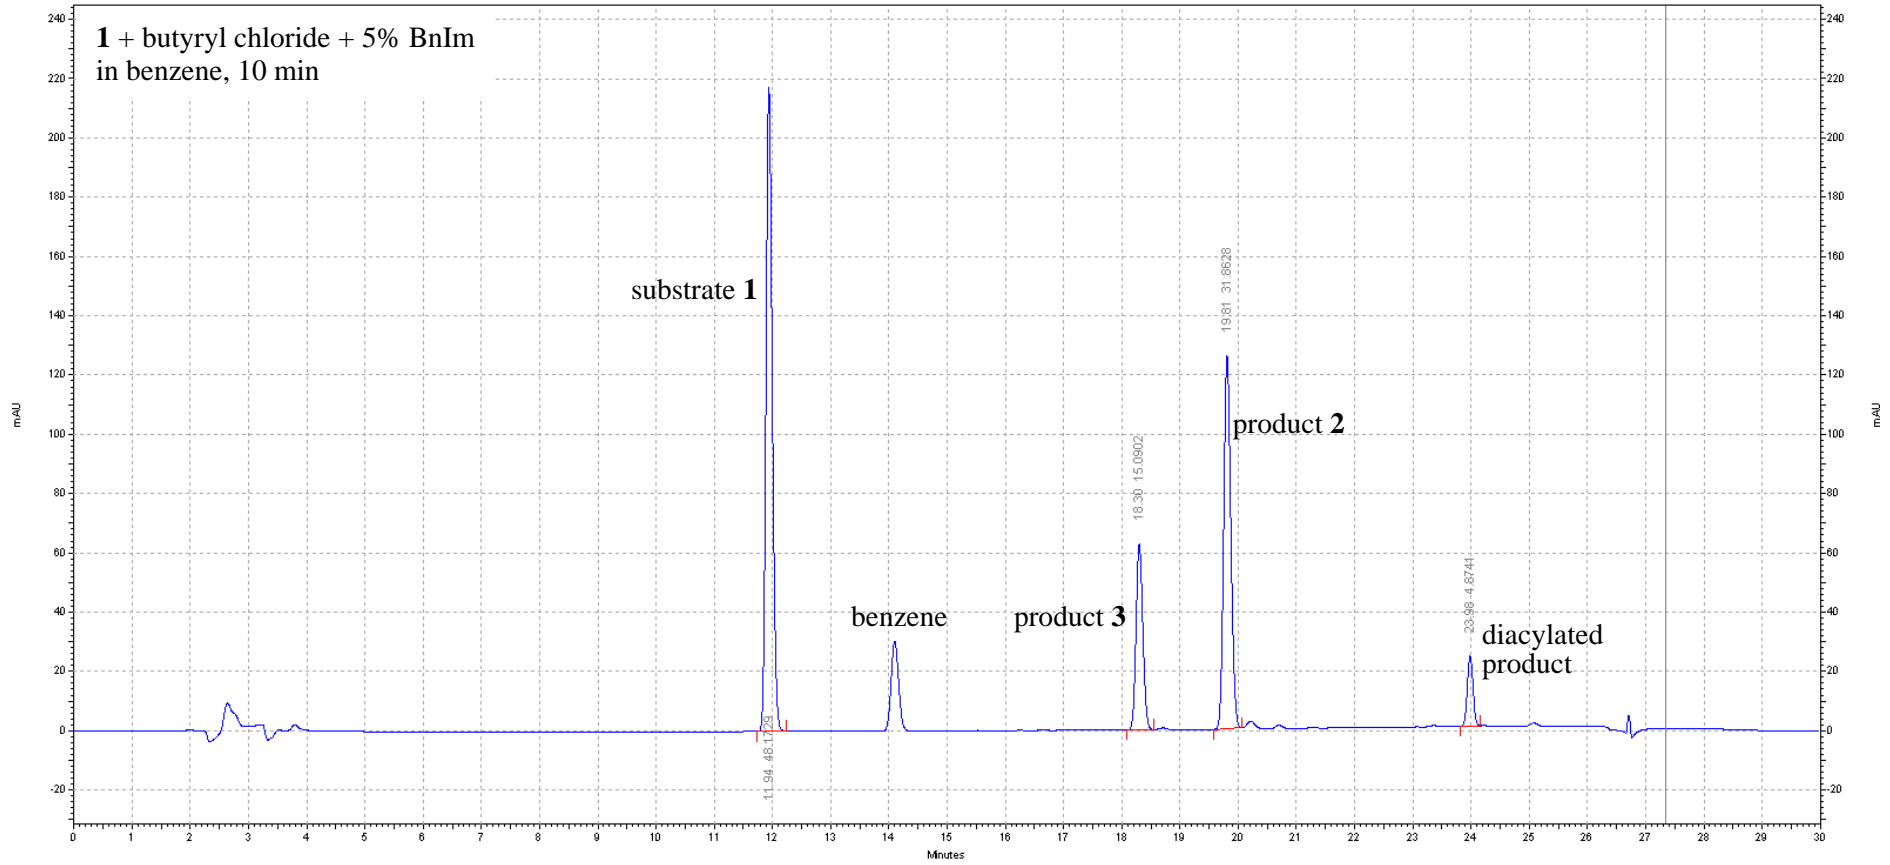

Time: 27.3235 Minutes - Amplitude: 0.813 mAU

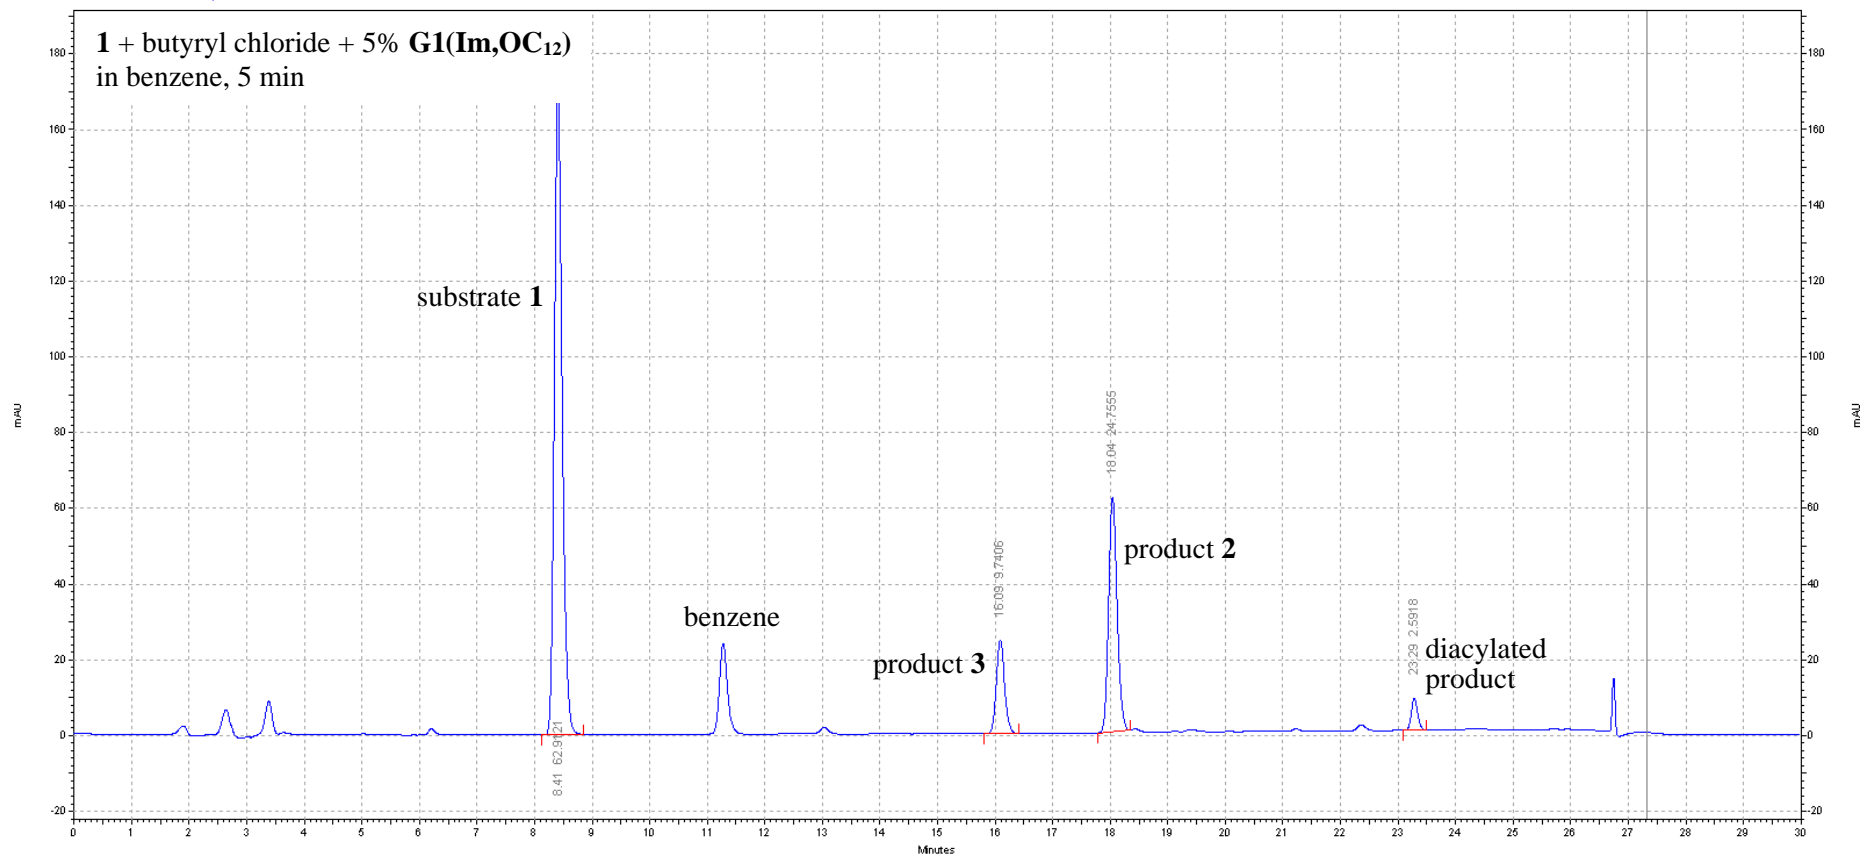

Time: 17.0171 Minutes - Amplitude: 0.71225 mAU

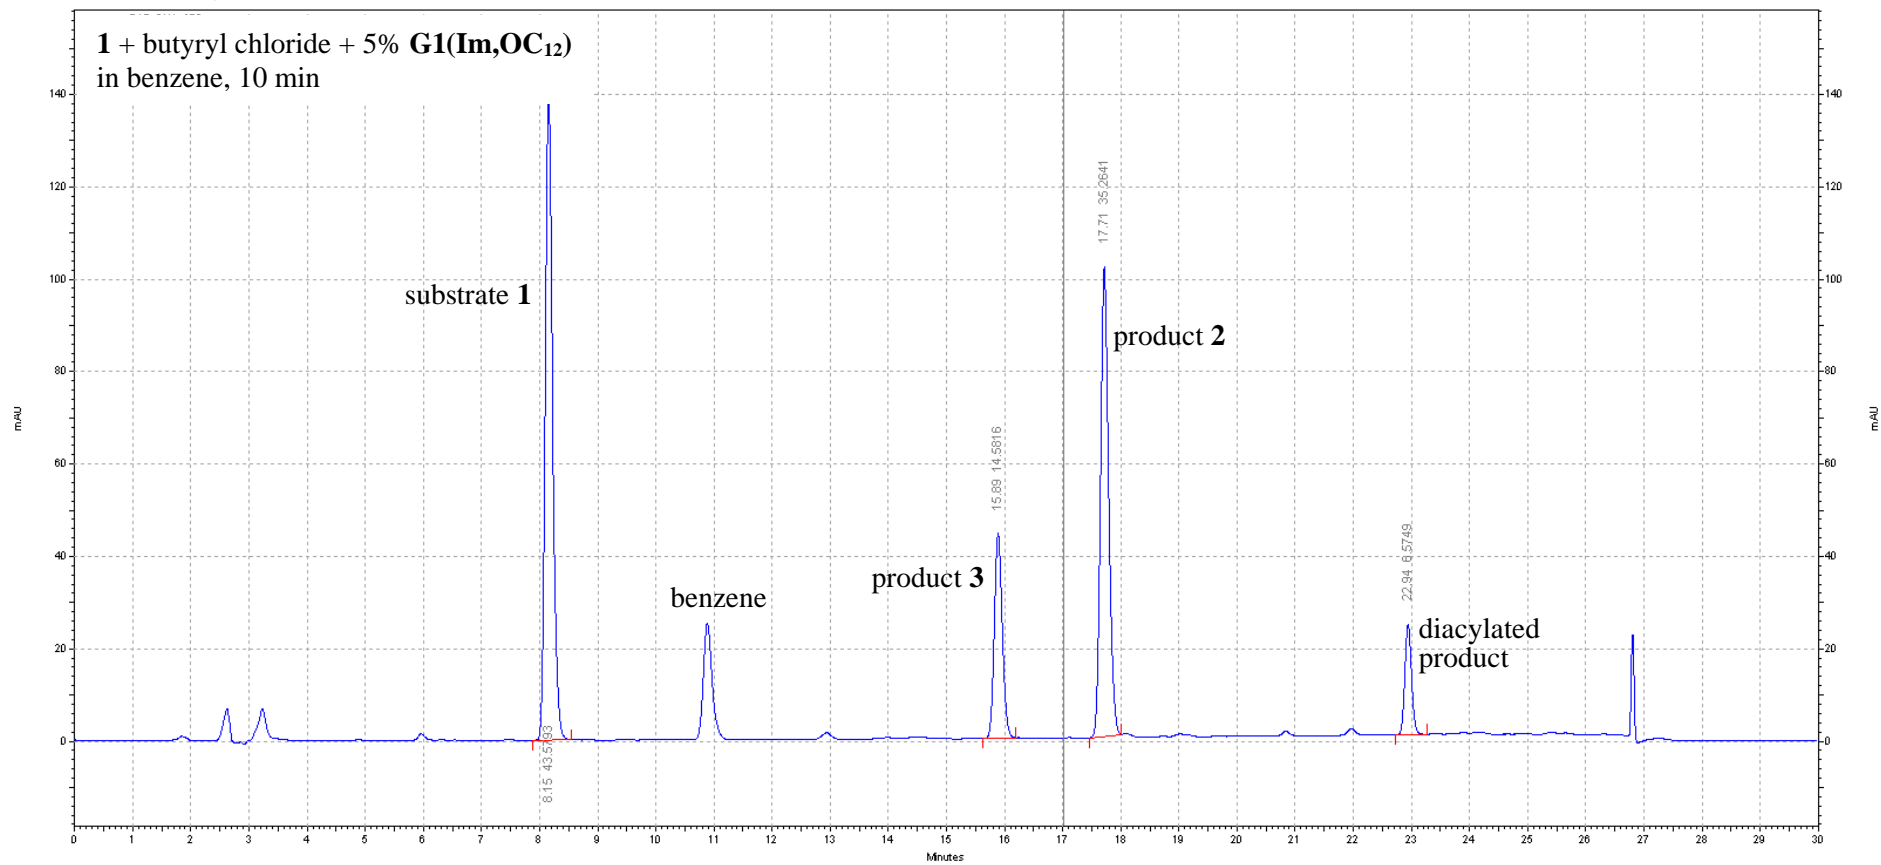

Time: 28.6553 Minutes - Amplitude: -0.22025 mAU

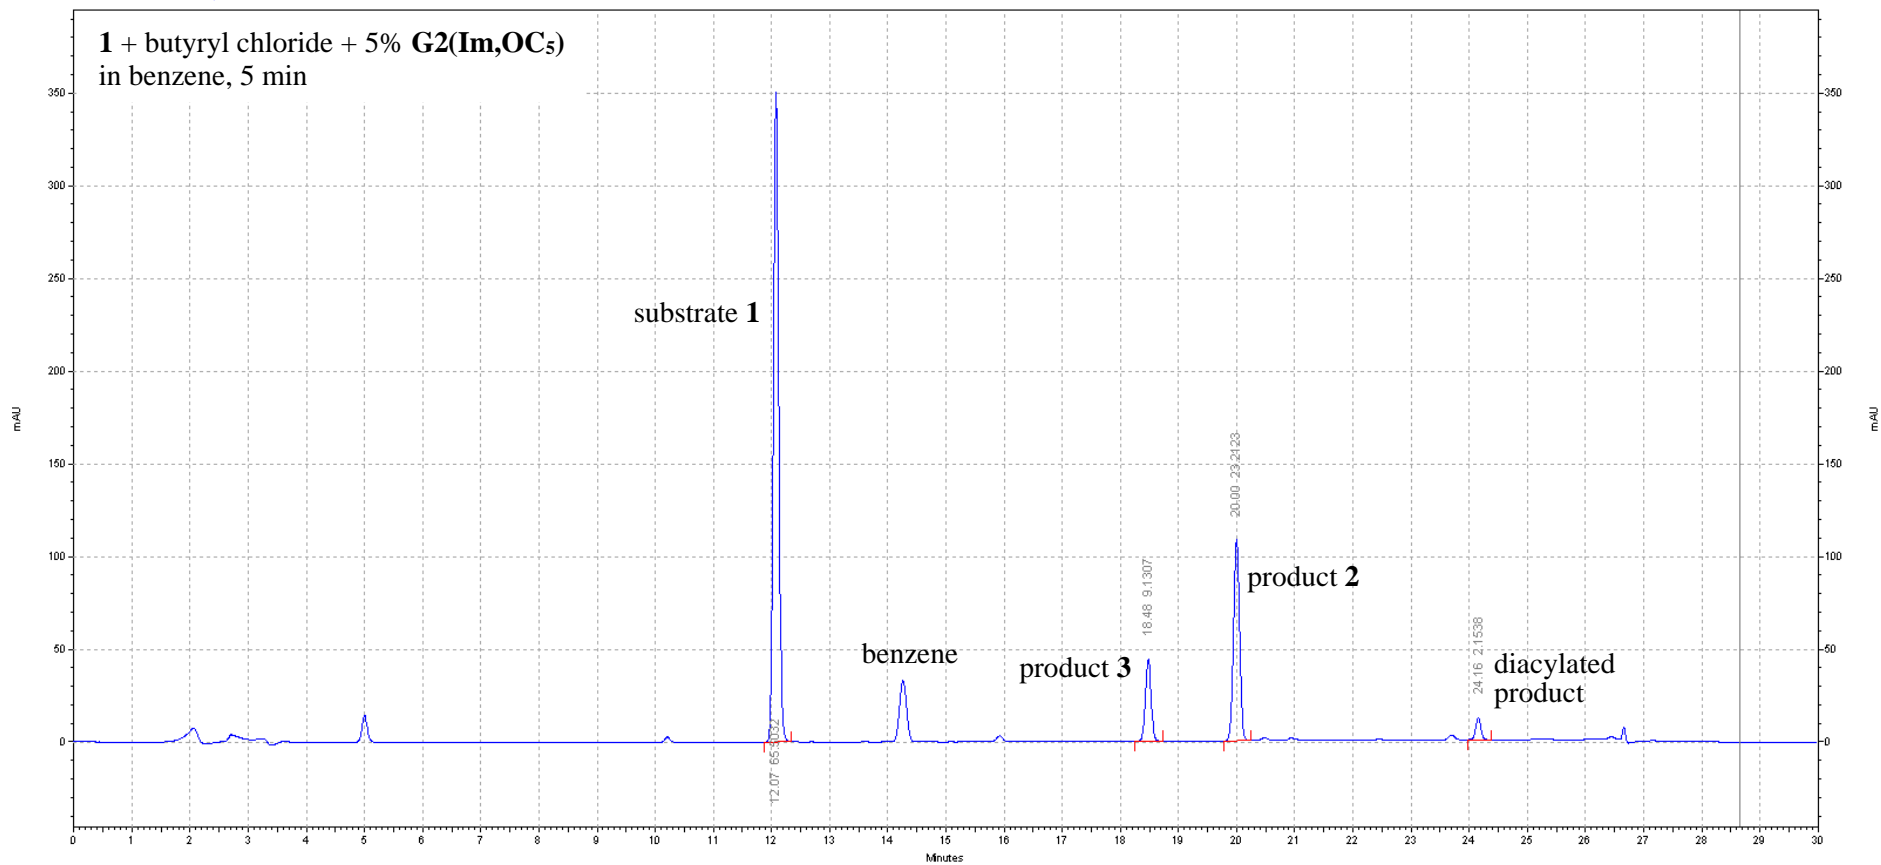



Time: 27.2633 Minutes - Amplitude: 0.88726 mAU

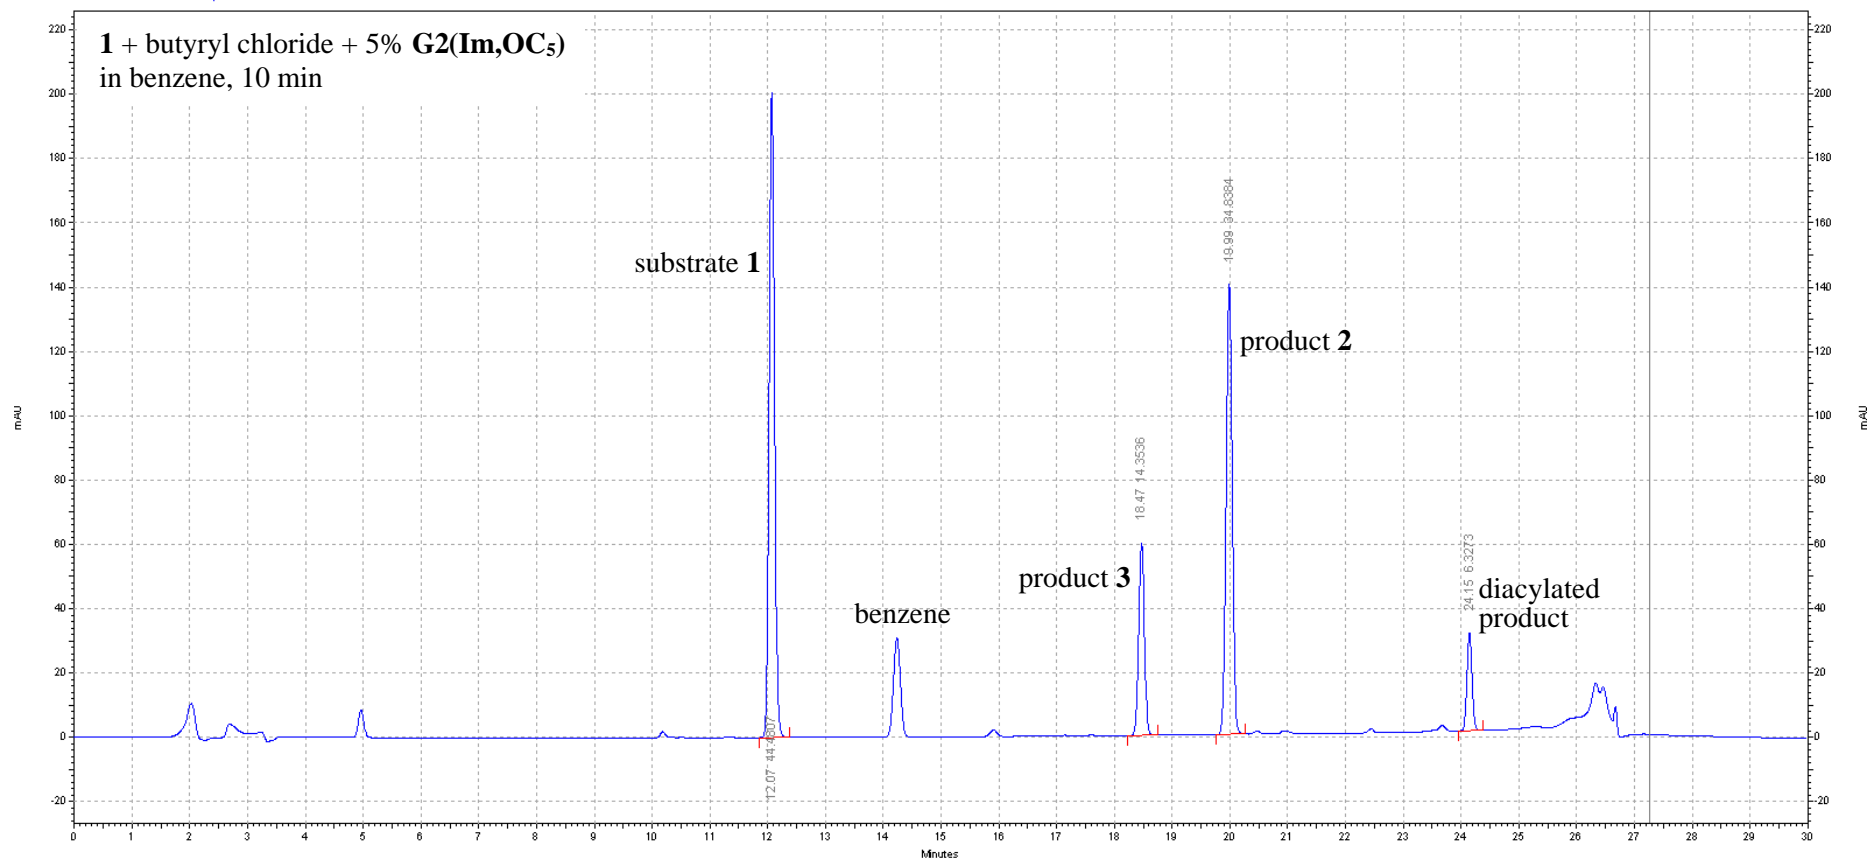

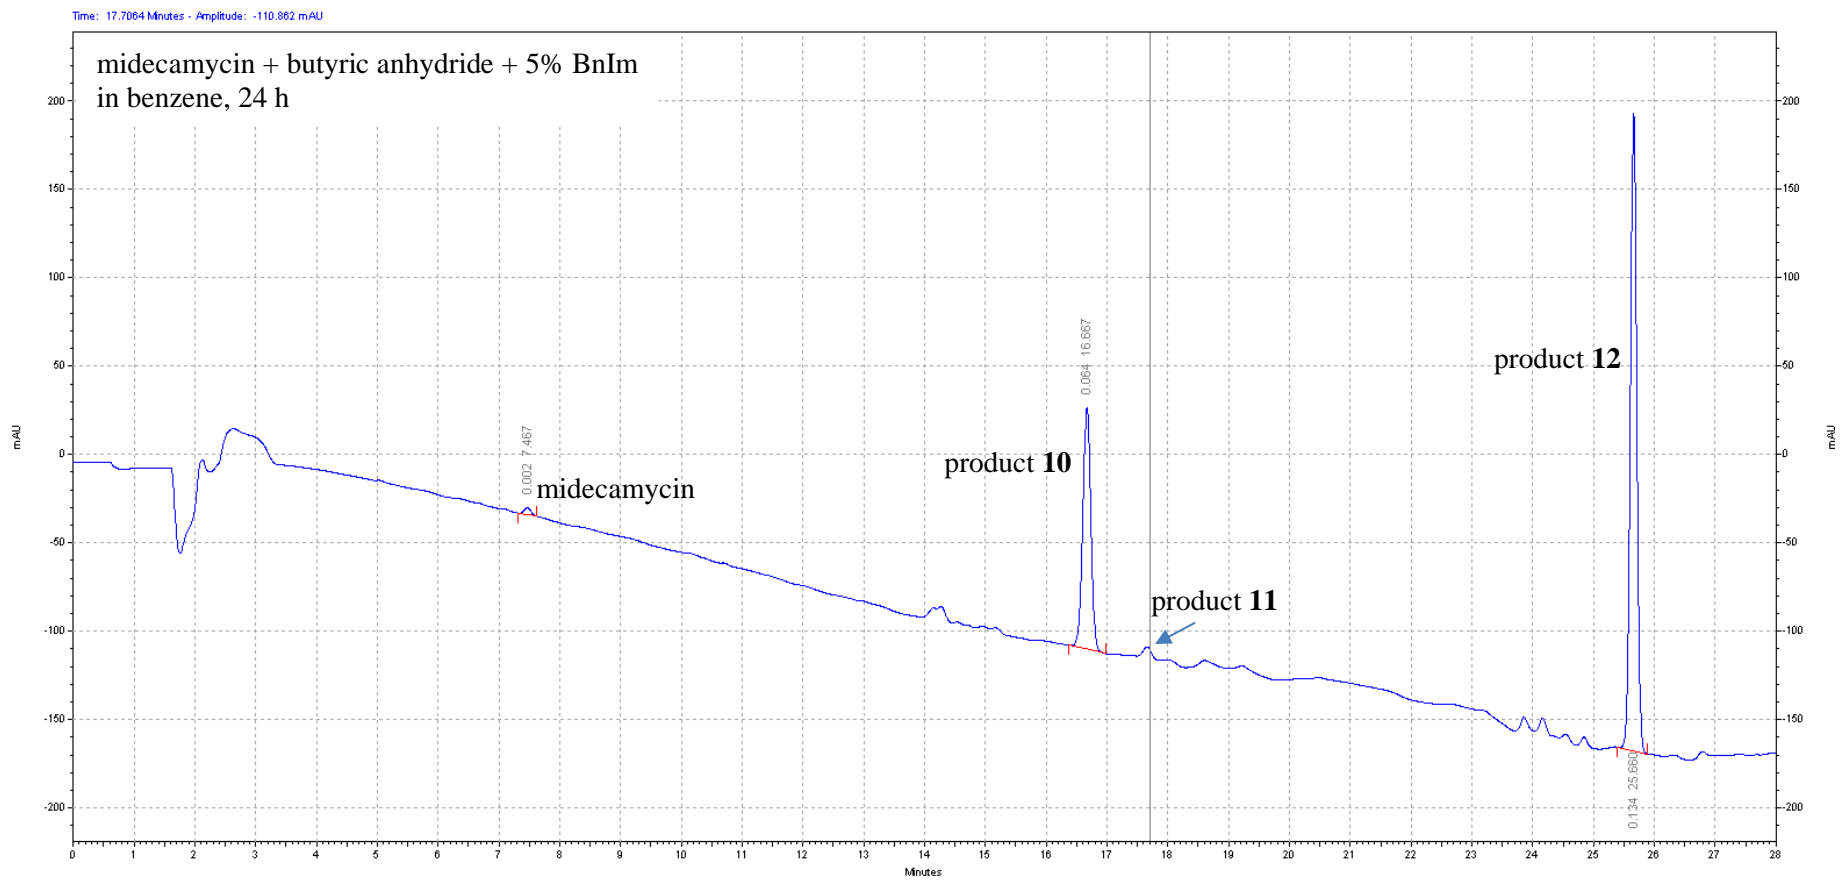

\* the integrations were extracted manually due to faulty printout

Time: 23.794 Minutes - Amplitude: -171.587 mAU

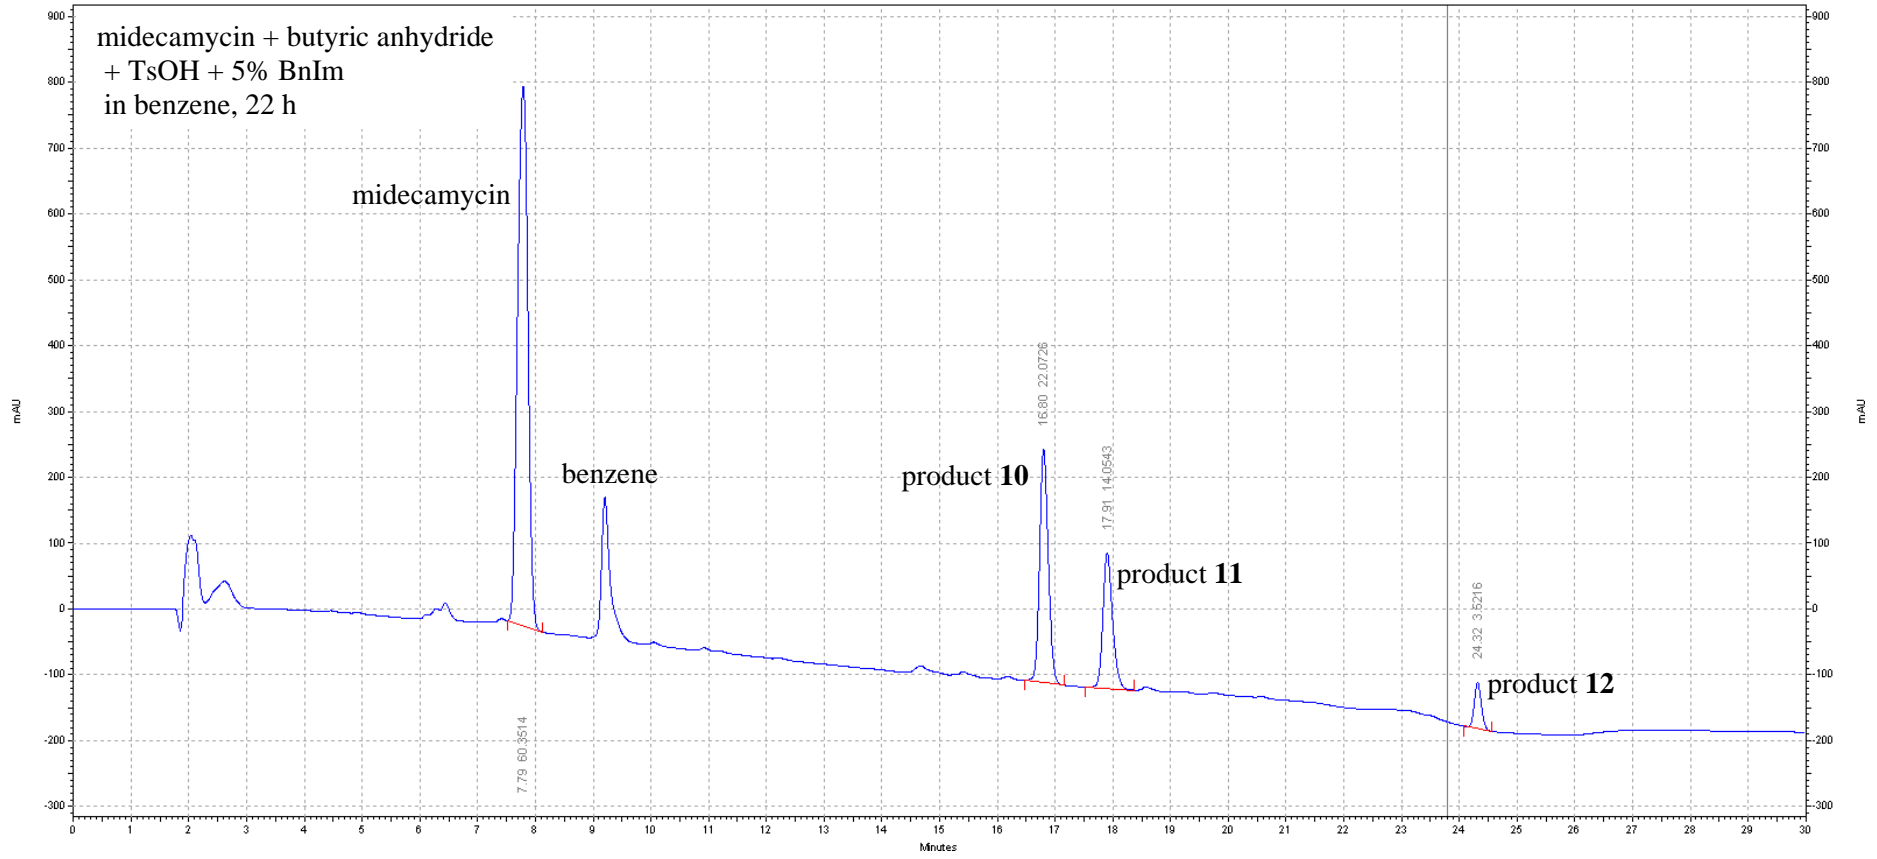

Time: 25.3469 Minutes - Amplitude: -186.73 mAU

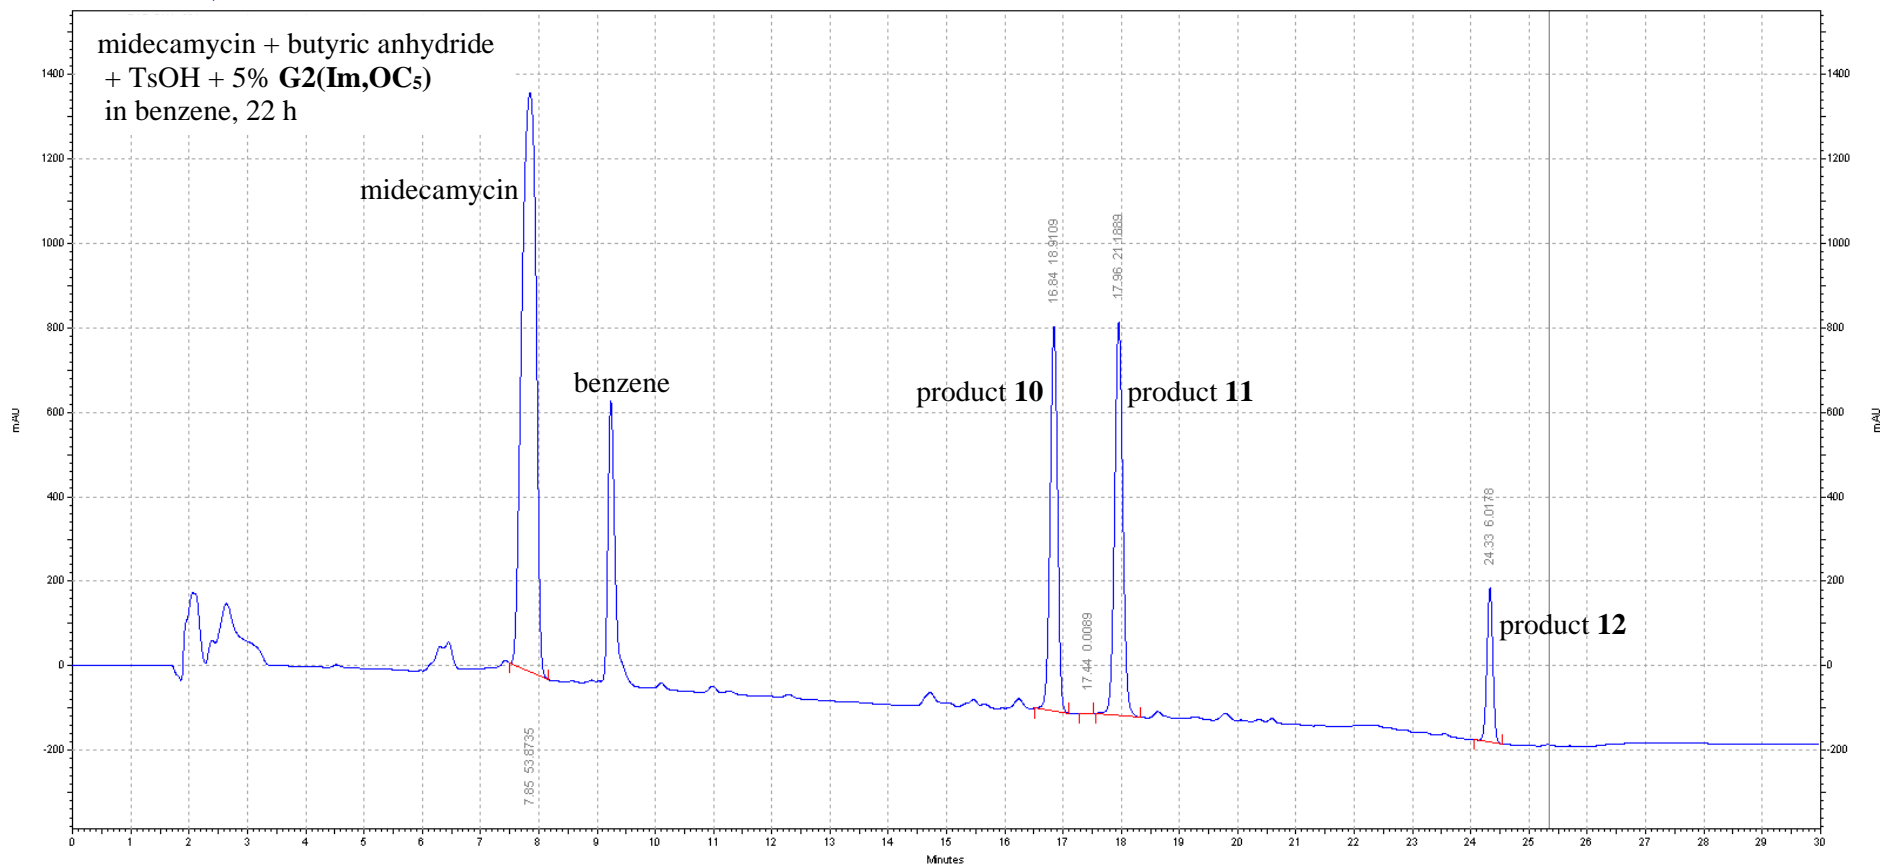

Time: 17.8044 Minutes - Amplitude: -85.3148 mAU

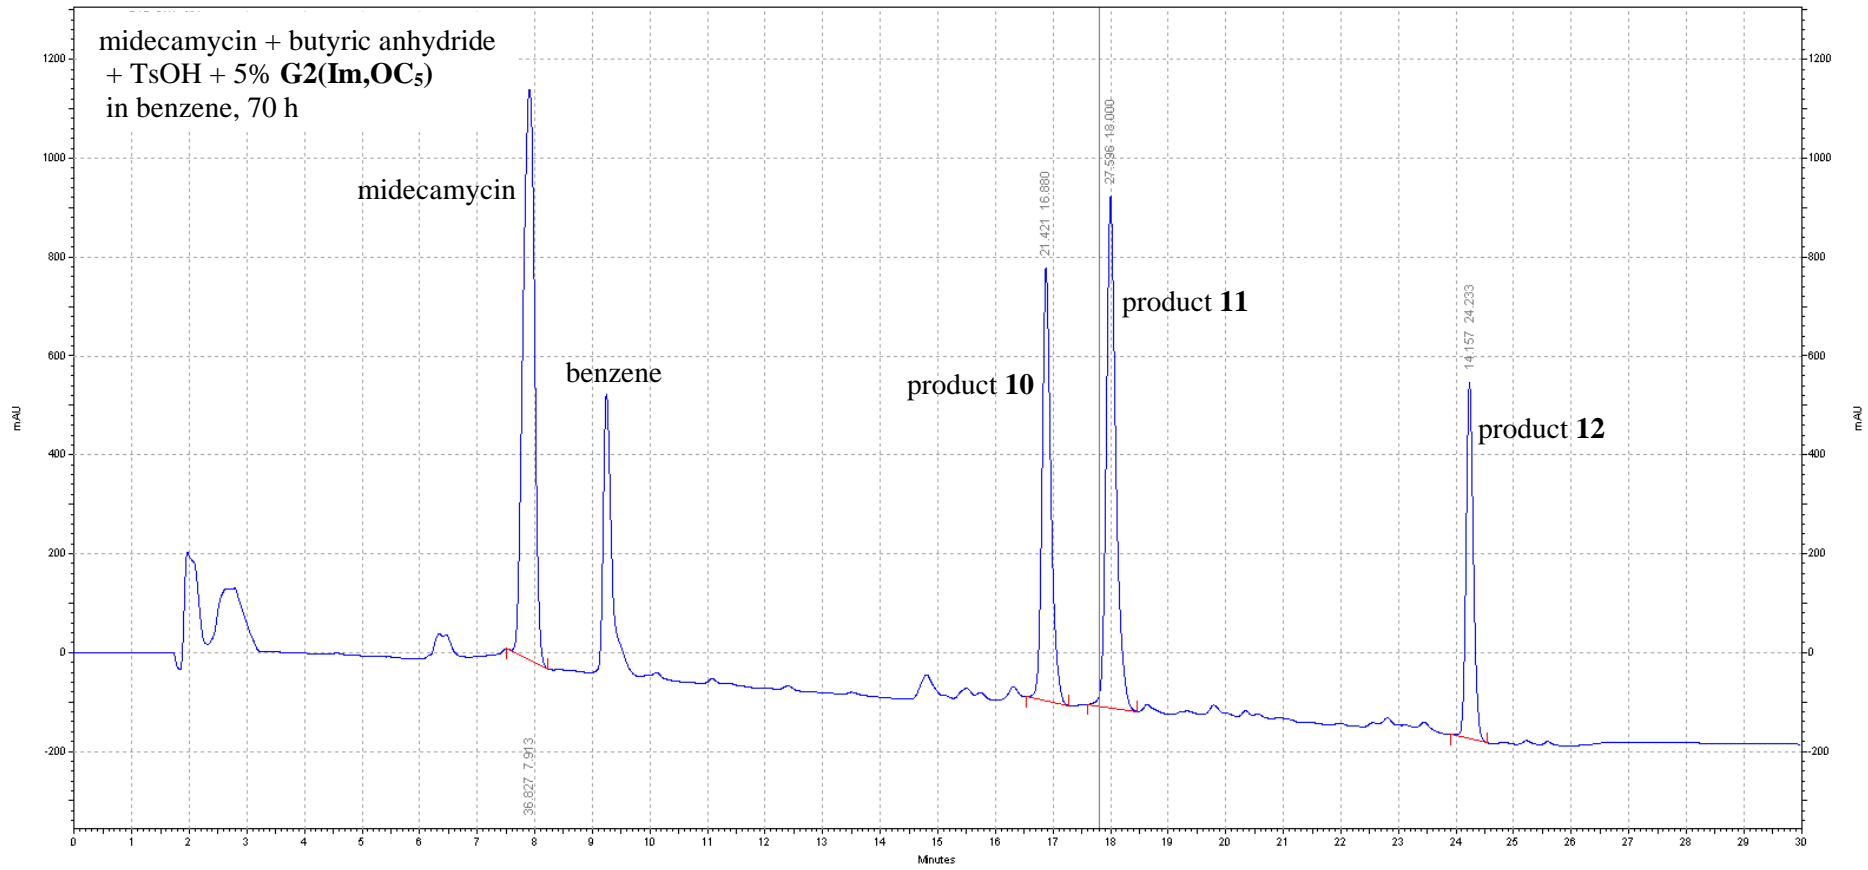

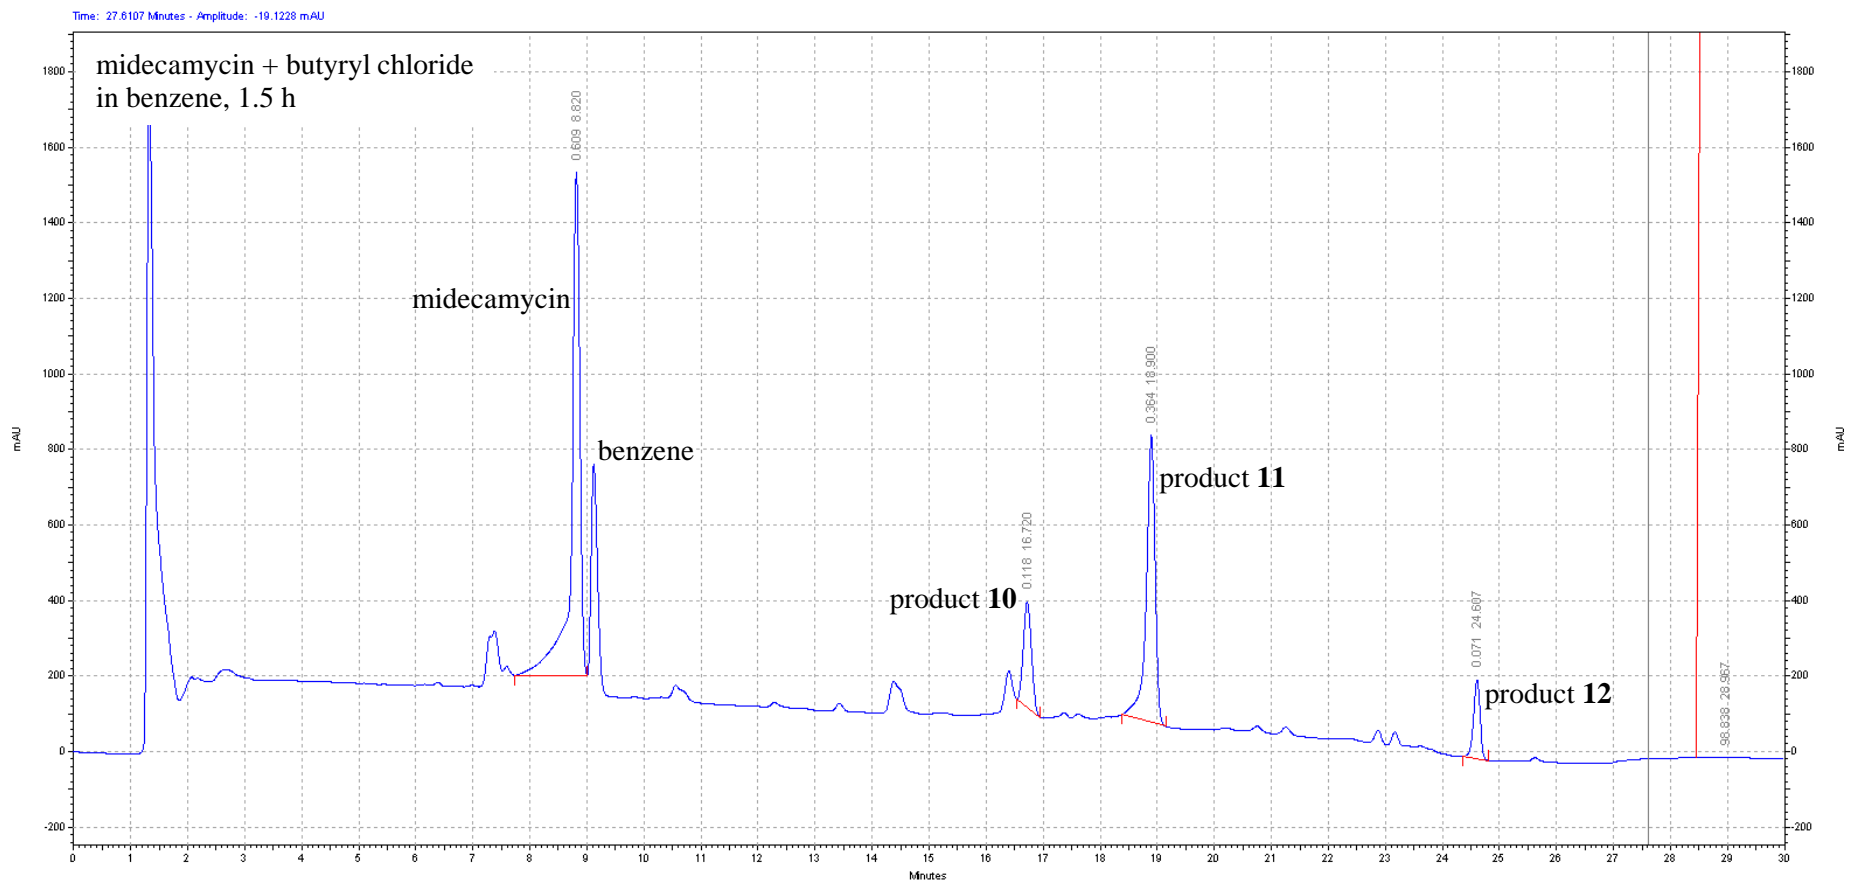

\* the integrations were extracted manually due to faulty printout

Time: 9.58707 Minutes - Amplitude: 1276.26 mAU

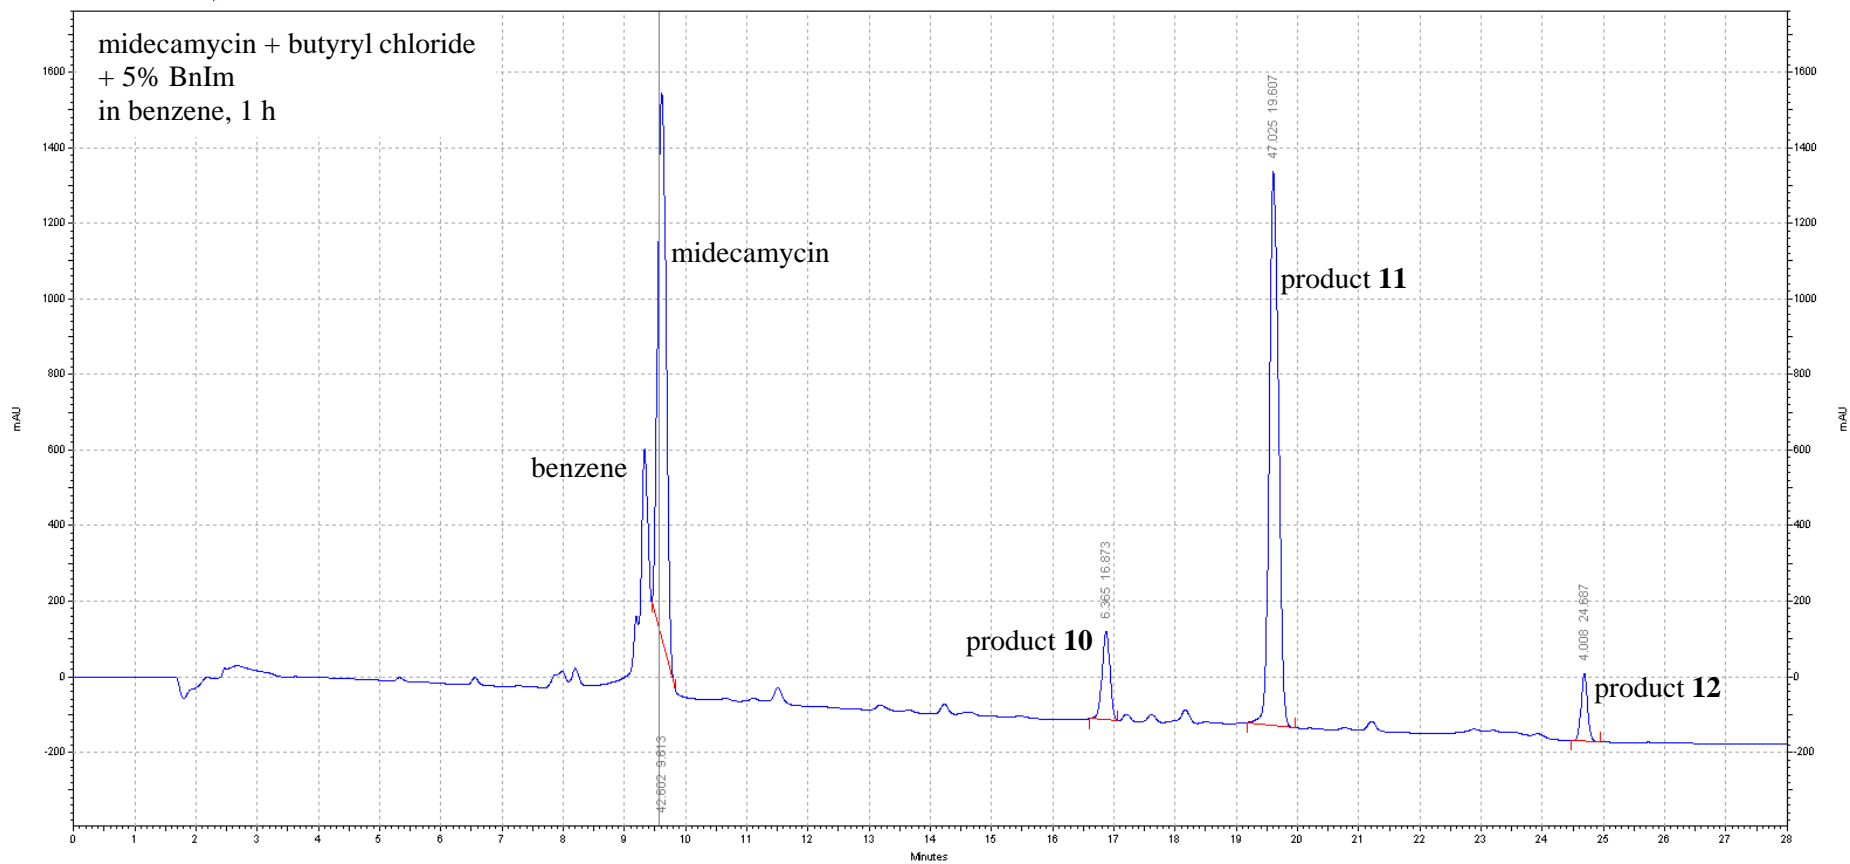

Time: 17.3057 Minutes - Amplitude: -92.7368 mAU

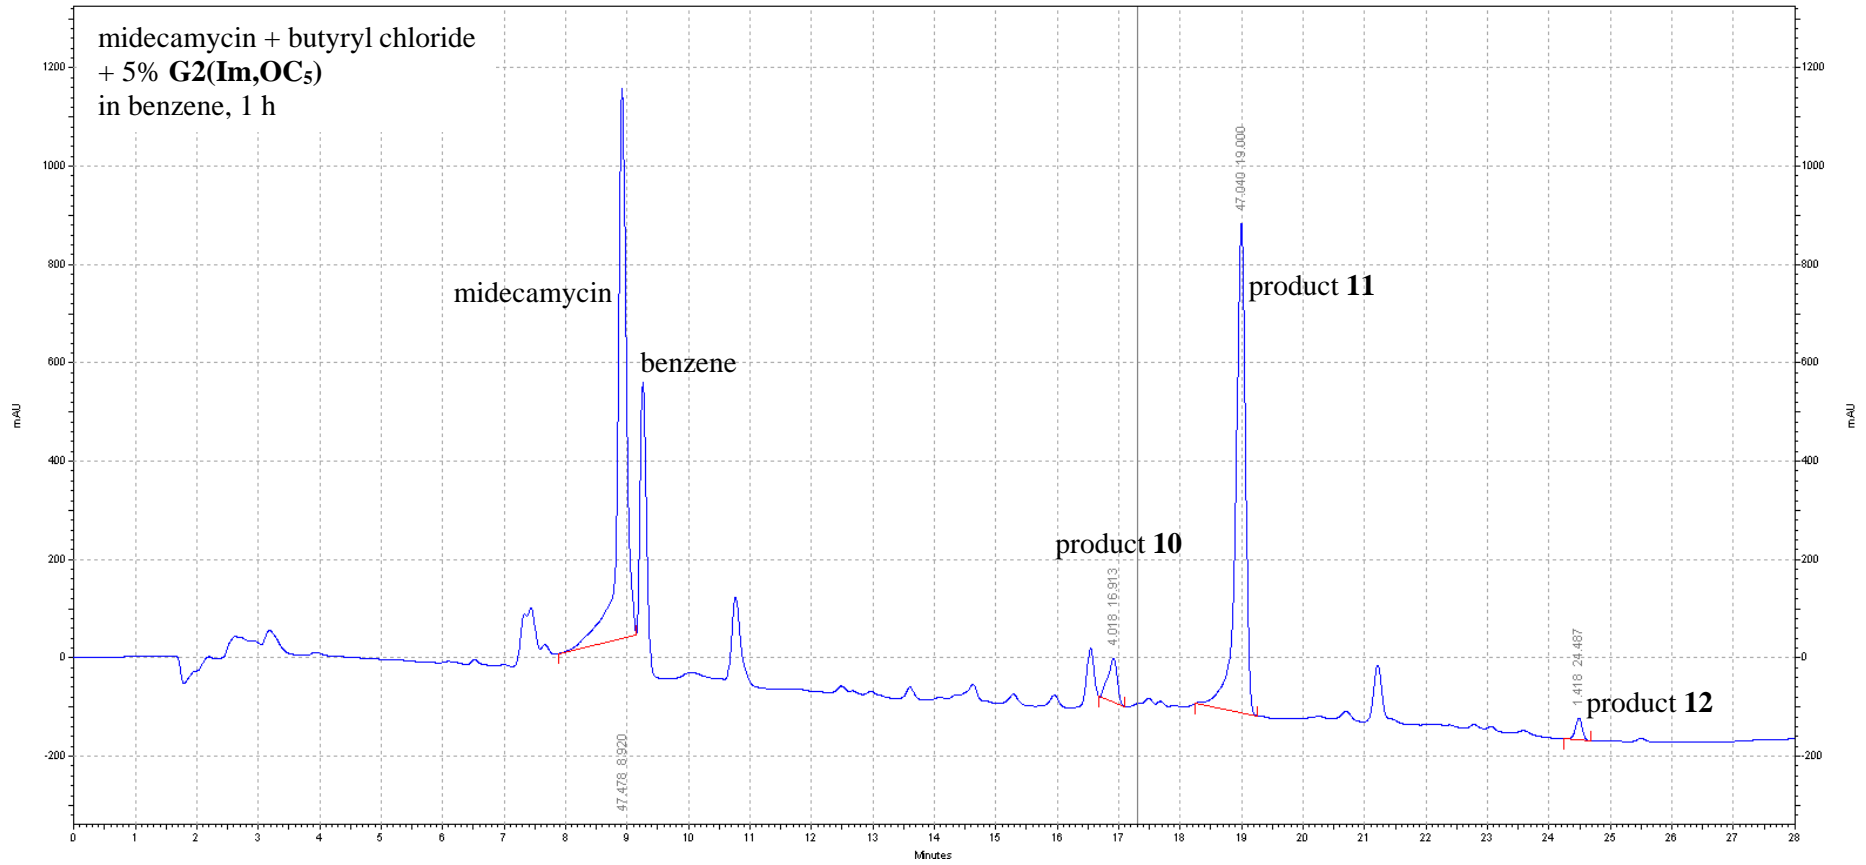

Supplement: jo2c00745_si_001.pdf [file jo2c00745_si_001.pdf]
